# Supplementary material
Source: publisher site journal article supplement (https://www.dovepress.com/article/406552)
Supplement: Supplementary file 1 [file get_supplementary_file.php]

|    |                                                                                 |           |
|----|---------------------------------------------------------------------------------|-----------|
| 1  | Latour et al. Supplemental Material                                             |           |
| 2  | <b>Table of Contents</b>                                                        |           |
| 3  | <b><i>Supplemental Methods 1</i></b> .....                                      | <b>2</b>  |
| 4  | <b><i>Supplemental Methods 2</i></b> .....                                      | <b>3</b>  |
| 5  | <b><i>Supplemental Methods 3</i></b> .....                                      | <b>4</b>  |
| 6  | <b><i>Supplemental Methods 4</i></b> .....                                      | <b>5</b>  |
| 7  | <b><i>Figures Describing the Simulation Set-Up</i></b> .....                    | <b>6</b>  |
| 8  | Supplemental Figure 1.....                                                      | 7         |
| 9  | Supplemental Figure 2.....                                                      | 8         |
| 10 | <b><i>Figures Depicting the Simulation Results</i></b> .....                    | <b>9</b>  |
| 11 | Supplemental Figure 3.....                                                      | 10        |
| 12 | Supplemental Figure 4.....                                                      | 11        |
| 13 | Supplemental Figure 5.....                                                      | 12        |
| 14 | Supplemental Figure 6.....                                                      | 13        |
| 15 | Supplemental Figure 7.....                                                      | 14        |
| 16 | <b><i>Tables Describing the Simulation Set-Up</i></b> .....                     | <b>15</b> |
| 17 | Supplemental Table 1.....                                                       | 16        |
| 18 | <b><i>Tables Showing Descriptive Statistics of the Simulated Data</i></b> ..... | <b>17</b> |
| 19 | Supplemental Table 2.....                                                       | 18        |
| 20 | Supplemental Table 3.....                                                       | 19        |
| 21 | Supplemental Table 4.....                                                       | 21        |
| 22 | Supplemental Table 5.....                                                       | 23        |
| 23 | Supplemental Table 6.....                                                       | 25        |
| 24 | <b><i>Tables Displaying Simulation Performance Measures</i></b> .....           | <b>27</b> |
| 25 | Supplemental Table 7.....                                                       | 28        |
| 26 | Supplemental Table 8.....                                                       | 32        |
| 27 | Supplemental Table 9.....                                                       | 36        |
| 28 |                                                                                 |           |
| 29 |                                                                                 |           |

30 **Supplemental Methods 1.** Justification for data generation parameters.

31

32 Below, we provide justification for the parameters used in this study to generate our simulation data.

33

| <b>Parameter/Generation</b>                                                                                               | <b>Justification</b>                                                                                                                                                                                                                                                                                                     |
|---------------------------------------------------------------------------------------------------------------------------|--------------------------------------------------------------------------------------------------------------------------------------------------------------------------------------------------------------------------------------------------------------------------------------------------------------------------|
| We randomly assigned patients to have “more-severe” or “less-severe” ITP with a probability of 0.5.                       | This was done to maintain a relatively even distribution of patients across ITP severity and subsequently sample size. We randomly generated this value to preserve as much randomness as possible.                                                                                                                      |
| We generated 200 platelet counts for each person.                                                                         | This choice was made arbitrarily. Ultimately, we wanted to ensure sufficient sample size, as our primary concern was not performance of the methods in imbalanced settings, though this should be explored in other work.                                                                                                |
| Platelet counts were generated from normal distributions.                                                                 | This distribution was used for simplicity and ease of generation and selection in the simulation. Ultimately, the underlying distribution will not impact the results shown in this study, as we’re focused on the median platelet count, and the summary metric makes no assumptions about its underlying distribution. |
| We included patients into the cohort at $\leq 30 \times 10^9/L$ that occurred after $\geq 8$ platelet count measurements. | This cut point for inclusion mirrors the prior ITP study. 8 platelet counts was chosen arbitrarily. We wanted enough prior counts to understand the distribution. This reflects ideal settings, but likely should be explored further in real-world data.                                                                |
| Strongly and weakly differential RTM was generated using selection probabilities of 0.8/0.2 and 0.6/0.4, respectively.    | These probabilities were defined as such to explore this source of bias in an extreme and non-extreme scenario. This was unknown in the prior study, as it was not measured.                                                                                                                                             |
| Sample size of 200                                                                                                        | This mirrored the prior ITP study                                                                                                                                                                                                                                                                                        |
| Sample size of 10,000                                                                                                     | This was sufficiently large that we could run the analysis on servers and still understand if there were small sample concerns.                                                                                                                                                                                          |
| Treatment effect of $50 \times 10^9/L$                                                                                    | This mirrors the definition of durable platelet response (i.e., positive health outcome associated with therapy) in the original ITP study.                                                                                                                                                                              |

34

35

36

37 **Supplemental Methods 2.** Propensity score models.  
 38  
 39 For each scenario, we calculated 8 treatment effect estimates. Below, we describe the logistic regression  
 40 model used to calculate each estimate.

| <b>Adjustment Metric for Underlying Immune ITP Severity</b>                    | <b>Logistic Regression Model<sup>a</sup></b>                                                                                                                 |
|--------------------------------------------------------------------------------|--------------------------------------------------------------------------------------------------------------------------------------------------------------|
| (1) No Adjustment                                                              | No logistic regression model calculated.                                                                                                                     |
| (2) Platelet count mean prior to cohort entry                                  | $Y = \beta_0 + \beta_1 \times \mu$ $\mu = \text{Mean of the 8 platelet counts prior to cohort entry}$                                                        |
| (3) Platelet count standard deviation prior to cohort entry                    | $Y = \beta_0 + \beta_1 \times \sigma$ $\sigma = \text{Standard deviation of 8 platelet counts prior to cohort entry}$                                        |
| (4) Difference between most recent prior platelet count and cohort entry event | $Y = \beta_0 + \beta_1 \times \Delta_{recent}$ $\Delta_{recent} = \text{Difference between the most recent prior platelet count and the cohort entry event}$ |
| (5) Difference between largest prior platelet count and cohort entry event     | $Y = \beta_0 + \beta_1 \times \Delta_{largest}$ $\Delta_{largest} = \text{Difference between the largest prior platelet count and the cohort entry event}$   |
| (6) Platelet count mean and standard deviation prior to cohort entry           | $Y = \beta_0 + \beta_1 \times \mu + \beta_2 \times \sigma$                                                                                                   |
| (7) All summary measures calculated prior to cohort entry                      | $Y = \beta_0 + \beta_1 \times \mu + \beta_2 \times \sigma + \beta_3 \times \Delta_{recent} + \beta_4 \times \Delta_{largest}$                                |
| (8) Gold standard                                                              | $Y = \beta_0 + \beta_1 \times \eta$ $\eta = \text{A patients true disease severity value (i.e., more- or less-severe disease)}$                              |

41 <sup>a</sup> Y = Probability of treatment with romiplostim.

42

43 **Supplemental Methods 3.** Estimator of Median Overall Platelet Count

44

45 For each treatment group, we first calculated  $m(a)$ , the counterfactual median overall platelet count in a

46 population of patients with treatment  $A = a$ . We calculated  $m(a)$  by solving the estimating equation below:

47

48 
$$0 = 0.5 - \frac{1}{n} \sum_{i=1}^n \frac{1}{23} \sum_{j=2}^{24} \frac{I(Y_{i,j} < \hat{m}(a)) \Delta_{i,j} I(S_i = 1) I(A_i = a) I(M_i = 1)}{f_s f_\Delta \Pr(M_i = 1 | A_i, \bar{W}_i, S_i = 1, \Delta_{i,j} = 1)} W_i$$

49

50 where  $i$  indexes the observation under analysis,  $j$  indexes the week of follow-up that a patient platelet

51 count measure was drawn, and  $n$  indicates the number of patients in the cohort.  $Y_{i,j}$  represents the  $j^{\text{th}}$

52 platelet count for the  $i^{\text{th}}$  individual.  $\bar{W}_i$  denotes the history of patient covariates (up to the time of censoring

53 or event) and  $W_i$  are baseline covariates.  $S_i$  is an indicator that patient  $i$  does not have any missing

54 baseline covariate data.  $\Delta_{i,j}$  is an indicator that the  $j^{\text{th}}$  platelet count for the  $i^{\text{th}}$  individual was not censored.

55  $M_i$  is an indicator of having no missing platelet count data. Further,  $f_s = \Pr(S_i = 1 | W_{0i}^*)$  and  $f_\Delta =$

56  $\Pr(\Delta_{i,j} = 1 | A_i = a, \bar{W}_i, S_i = 1)$ . The treatment effect was estimated as the difference between the median

57 overall platelet counts of the two groups:  $m(1) - m(a)$ .

58 For the simulation analysis,  $W_i$  was calculated as a patient's inverse probability of treatment

59 weight:  $1/PS$  in the treatment group and  $1/(1-PS)$  in the SOC group. Further, this analysis did not allow for

60 missing data and was structured such that the only potential source of censoring was administrative.

61 Thus, we set  $f_s f_\Delta \Pr(M_i = 1 | A_i, \bar{W}_i, S_i = 1, \Delta_{i,j} = 1)$ ,  $\Delta_{i,j}$ ,  $I(S_i = 1)$ , and  $I(M_i = 1)$  all equal to 1. This

62 estimating equation was minimized for a solution using the optimize function within the stats package in

63 R.

64

65 References:

66 R Core Team (2018). R: A language and environment for statistical computing. R Foundation for

67 Statistical Computing, Vienna, Austria. URL <https://www.R-project.org/>.

68

69 **Supplemental Methods 4.** Formulas used to calculate performance metrics, as defined by Morris  
 70 et al. 2019.  
 71

| <b>Metric</b>            | <b>Definition</b>              | <b>Estimate</b>                                                                       |
|--------------------------|--------------------------------|---------------------------------------------------------------------------------------|
| Bias <sup>a</sup>        | $E[\hat{\theta}] - \theta$     | $\frac{1}{n_{sim}} \sum_{i=1}^{n_{sim}} \hat{\theta}_i - \theta$                      |
| Empirical Standard Error | $\sqrt{Var(\hat{\theta})}$     | $\sqrt{\frac{1}{n_{sim} - 1} \sum_{i=1}^{n_{sim}} (\hat{\theta}_i - \bar{\theta})^2}$ |
| Mean Squared Error       | $E[(\hat{\theta} - \theta)^2]$ | $\frac{1}{n_{sim}} \sum_{i=1}^{n_{sim}} (\hat{\theta}_i - \theta)^2$                  |

72  
 73 <sup>a</sup> We calculated confidence intervals for the average bias seen within a scenario as using the  
 74 estimated bias ( $\hat{\theta}$ ) and empirical standard error ( $\hat{\sigma}$ ). The bounds were calculated as  $\hat{\theta} \pm$   
 75  $(z_{97.5} \times \hat{\sigma} / \sqrt{n})$ , where  $z_{97.5}$  represents the 97.5<sup>th</sup> percentile of a Normal probability  
 76 distribution with mean 0 and standard deviation 1 (~1.96) and n represents the number of  
 77 simulations (2,000).  
 78

## Figures Describing the Simulation Set-Up

**Supplemental Figure 1.** Schematic depicting the platelet counts analyzed for each simulated participant.

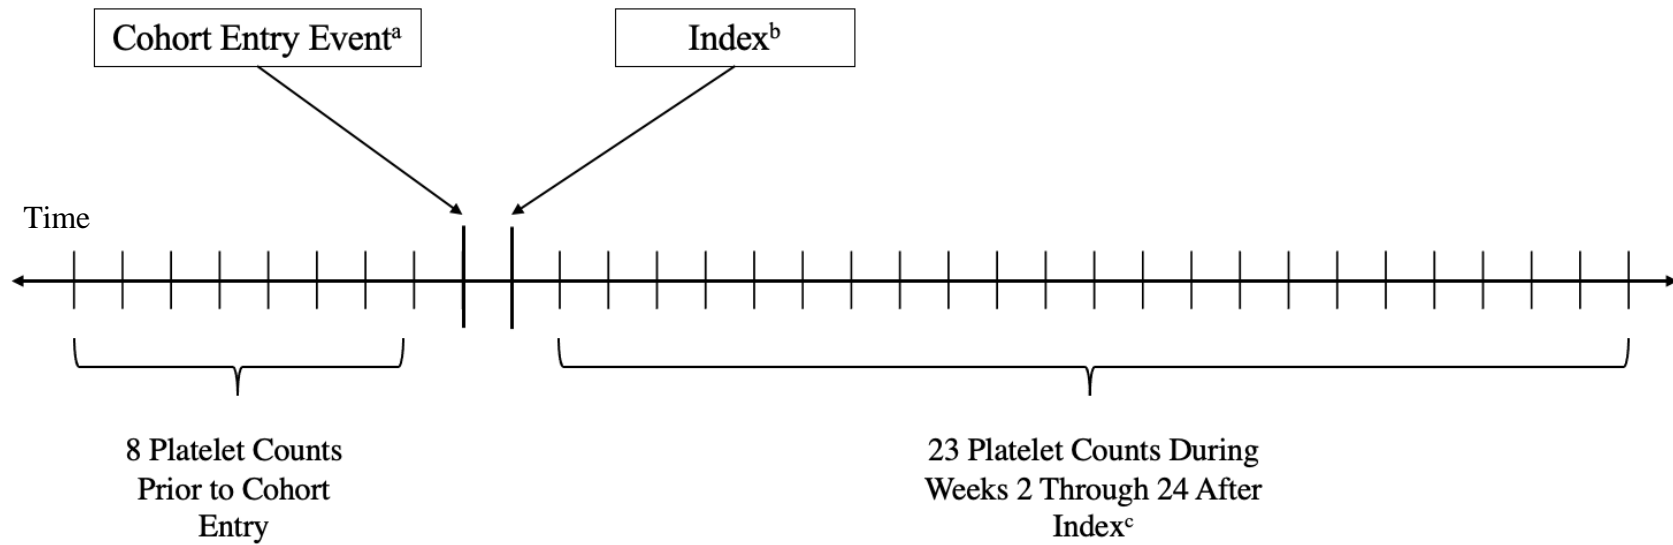

<sup>a</sup> The cohort entry event was defined as the first platelet count  $\leq 30 \times 10^9/L$  with at least 8 prior platelet counts.

<sup>b</sup> The index platelet count was defined as the first weekly platelet count after the anchor that was excluded from follow-up to allow a treatment effect.

<sup>c</sup> Additional platelet counts associated with a treatment effect are added to platelet counts from these weeks.

**Supplemental Figure 2.** Qualitative summary of results and conclusions made for scenarios B1 through B6. Conclusions apply for both null and non-null treatment effects and sample sizes of  $n=200$  and  $n=10,000$ .

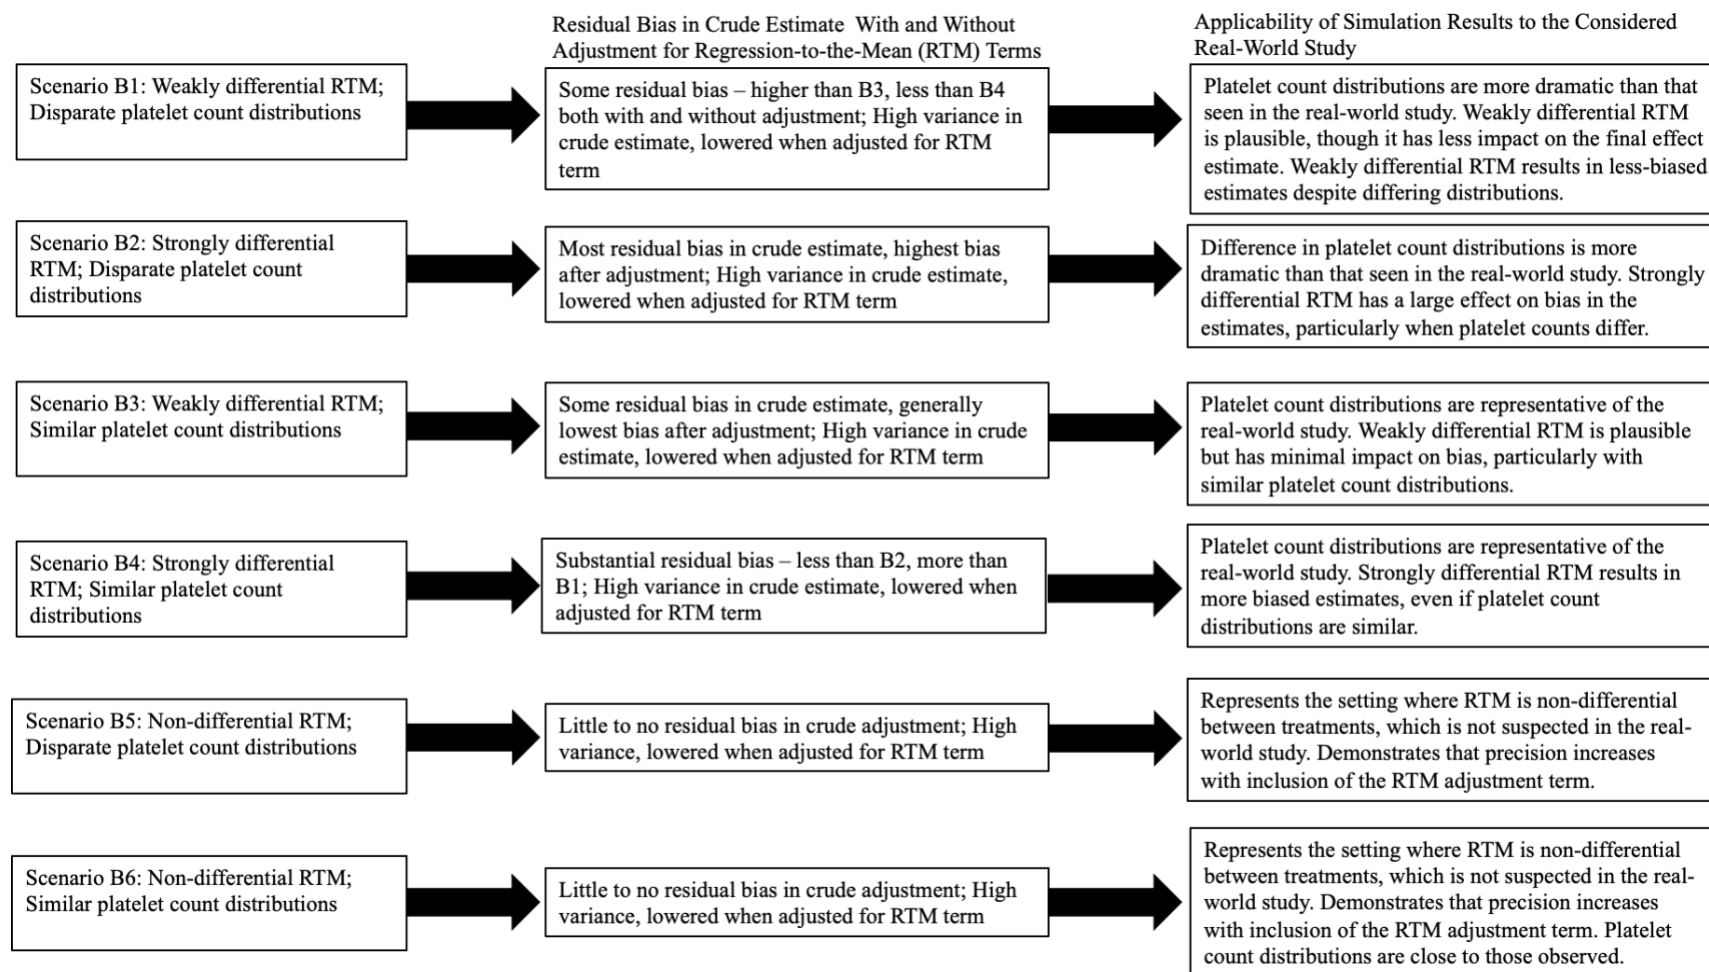

The strength of differential RTM refers to the probabilities used to select a patient's treatment based upon their predefined ITP severity strata. Strongly differential RTM corresponds to 0.8/0.2 treatment selection probabilities, weakly differential RTM to 0.6/0.4, and non-differential to 0.5/0.5. Platelet counts are derived for each patient from normal distributions with a predefined mean ( $\mu$ ) and standard deviation ( $\sigma$ ). Similar platelet count distributions are defined by  $\mu=55$ ,  $\sigma=20$  for the less-severe versus  $\mu=35$ ,  $\sigma=10$  for the more-severe ITP strata.



## Figures Depicting the Simulation Results

**Supplemental Figure 3.** Violin plot depicting the adjusted differences in median platelet count between treatment groups for scenario B1, where RTM is weakly differential (0.6/0.4 probability of treatment/standard-of-care in the severe ITP group), and the platelet distributions differ disparately by underlying immune thrombocytopenia (ITP) severity (i.e.,  $\mu=100$  and  $\sigma=50$  for less-severe ITP versus  $\mu=40$  and  $\sigma=15$  for more-severe ITP). The true change in median platelet count is null, and the initial sample size is  $n=200$ .

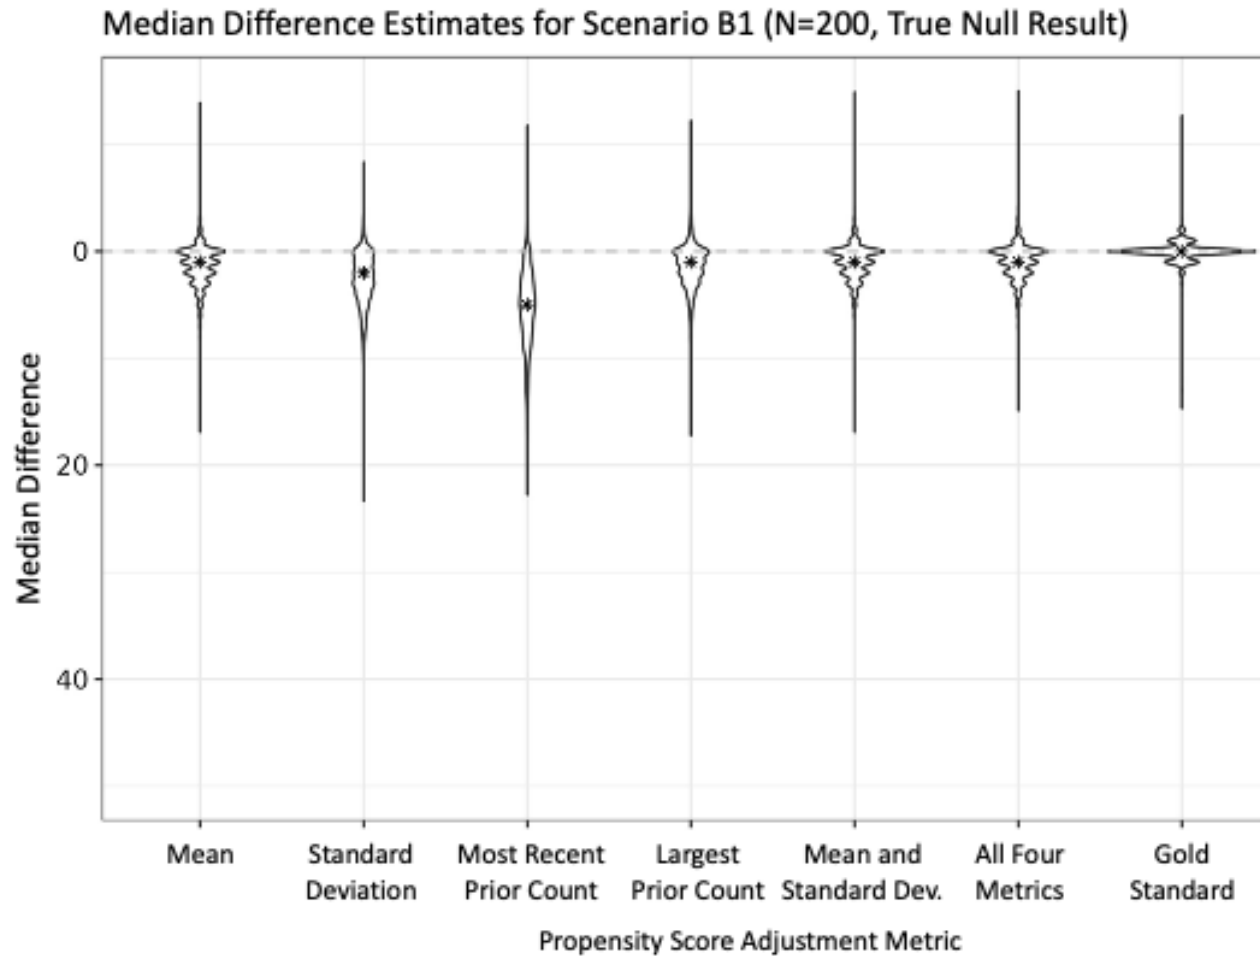

The star indicates the median of the differences between the two treatment groups' median follow-up platelet counts.

**Supplemental Figure 4.** Violin plot depicting the adjusted and unadjusted difference in median platelet count between treatment groups for scenario B3, where RTM is strongly differential (0.6/0.4 probability of treatment/standard-of-care in the severe ITP group), and the platelet distributions are relatively similar by underlying immune thrombocytopenia (ITP) severity (i.e.,  $\mu=55$  and  $\sigma=20$  for less-severe ITP versus  $\mu=35$  and  $\sigma=10$  for more-severe ITP). The true change in median platelet count is null, and the initial sample size is  $n=200$ .

Median Difference Estimates for Scenario B3 (N=200, True Null Result)

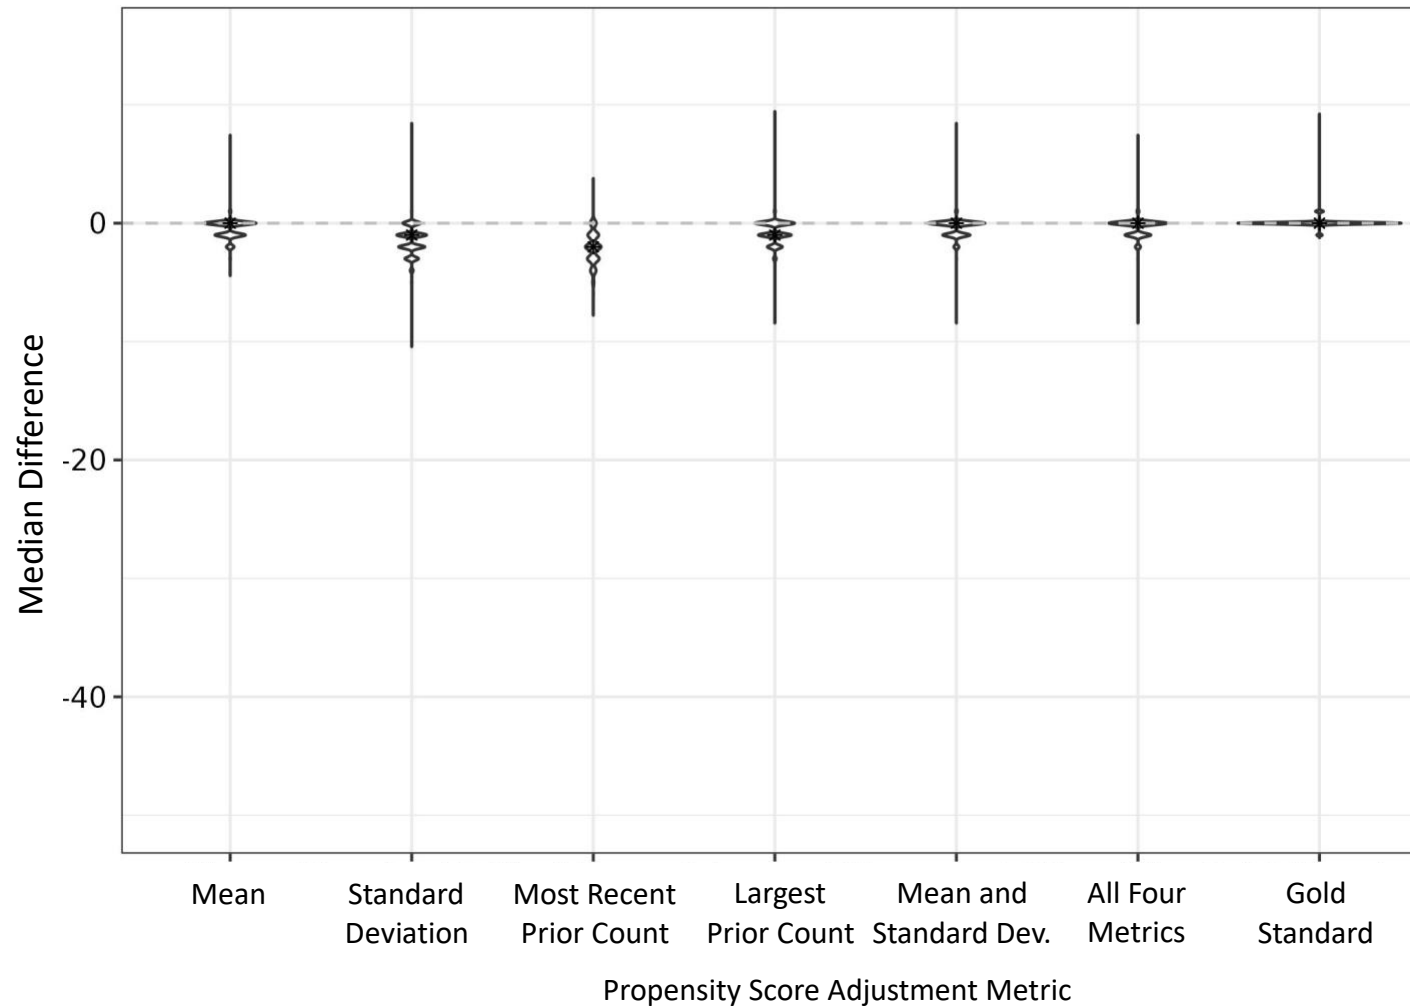

The star indicates the median of the differences between the two treatment groups' median follow-up platelet counts.

**Supplemental Figure 5.** Violin plot depicting the adjusted and unadjusted difference in median platelet count between treatment groups for scenario B4, where RTM is strongly differential (0.8/0.2 probability of treatment/standard-of-care in the severe ITP group), and the platelet distributions are relatively similar by underlying immune thrombocytopenia (ITP) severity (i.e.,  $\mu=55$  and  $\sigma=20$  for less-severe ITP versus  $\mu=35$  and  $\sigma=10$  for more-severe ITP). The true change in median platelet count is null, and the initial sample size is  $n=200$ .

Median Difference Estimates for Scenario B4 (N=200, True Null Result)

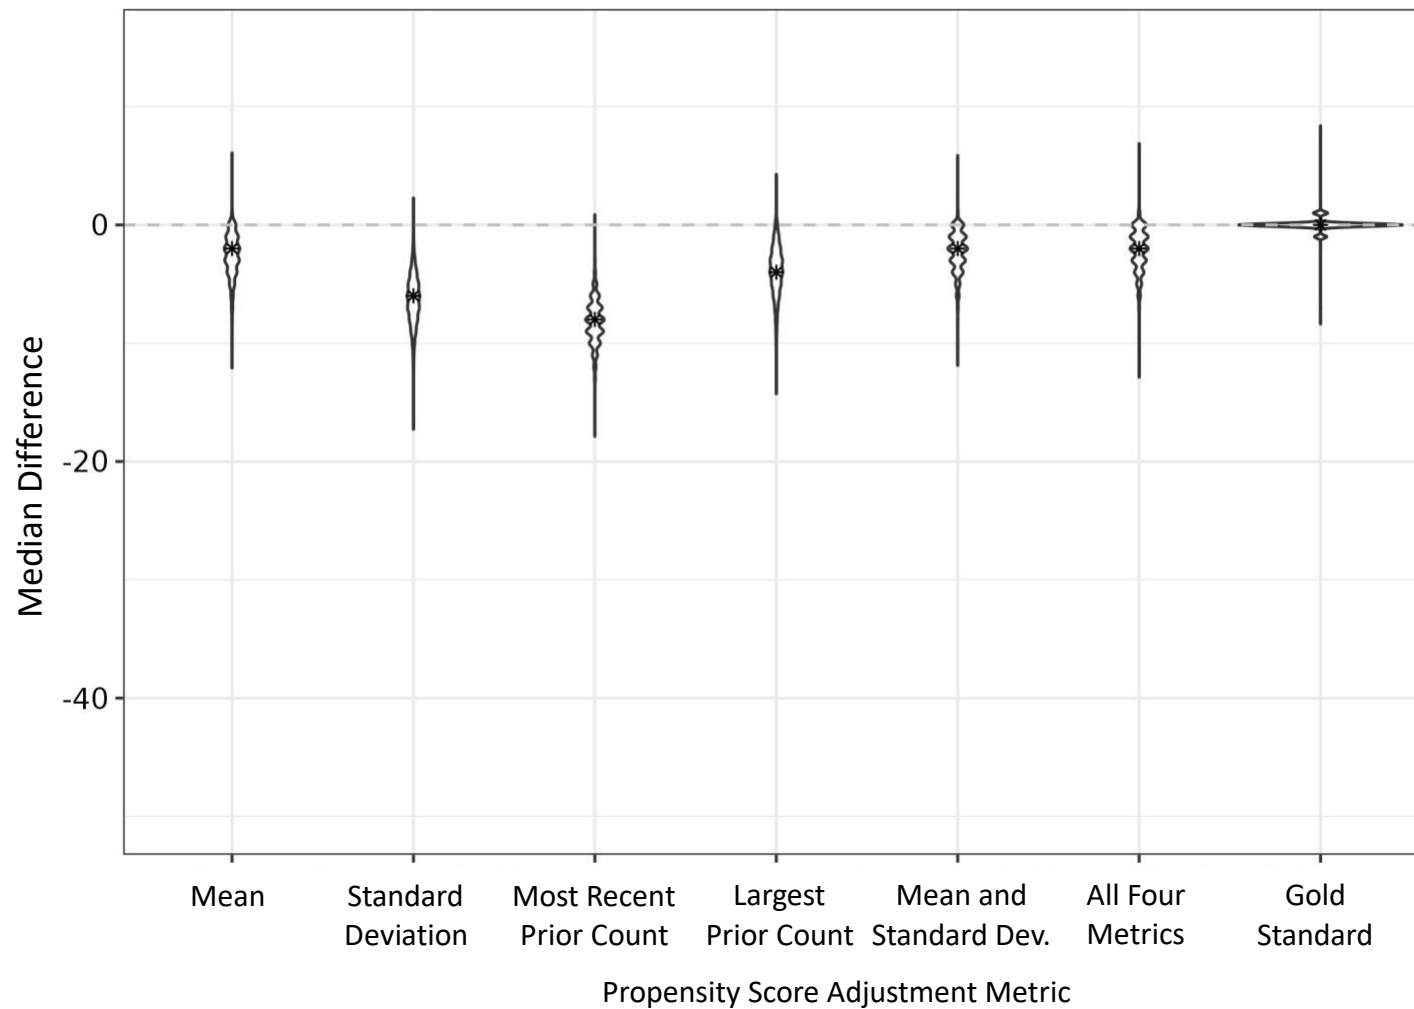

The star indicates the median of the differences between the two treatment groups' median follow-up platelet counts.

**Supplemental Figure 6.** Violin plot depicting the adjusted and unadjusted difference in median platelet count between treatment groups for scenario B5, where RTM is non-differential (0.5/0.5 probability of treatment/standard-of-care in the severe ITP group), and the platelet distributions differ disparately by underlying immune thrombocytopenia (ITP) severity (i.e.,  $\mu=100$  and  $\sigma=50$  for less-severe ITP versus  $\mu=40$  and  $\sigma=15$  for more-severe ITP). The true change in median platelet count is null, and the initial sample size is  $n=200$ .

Median Difference Estimates for Scenario B5 (N=200, True Null Result)

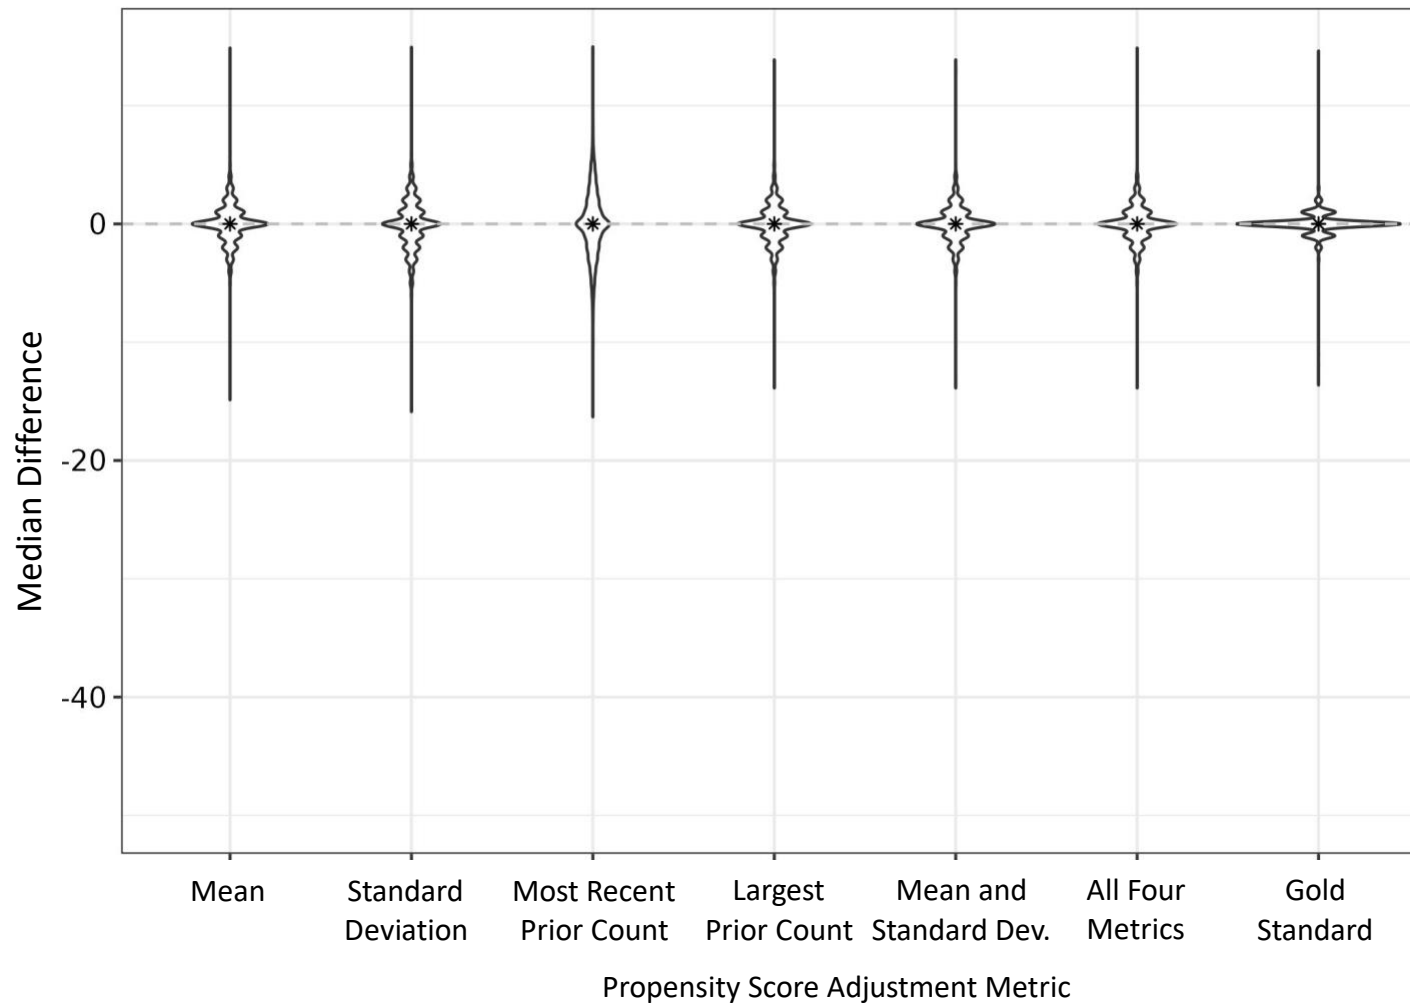

The star indicates the median of the differences between the two treatment groups' median follow-up platelet counts.

**Supplemental Figure 7.** Violin plot depicting the adjusted and unadjusted difference in median platelet count between treatment groups for scenario B6, where RTM is non-differential (0.5/0.5 probability of treatment/standard-of-care in the severe ITP group), and the platelet distributions are relatively similar by underlying immune thrombocytopenia (ITP) severity (i.e.,  $\mu=55$  and  $\sigma=20$  for less-severe ITP versus  $\mu=35$  and  $\sigma=10$  for more-severe ITP). The true change in median platelet count is null, and the initial sample size is  $n=200$ .

Median Difference Estimates for Scenario B6 (N=200, True Null Result)

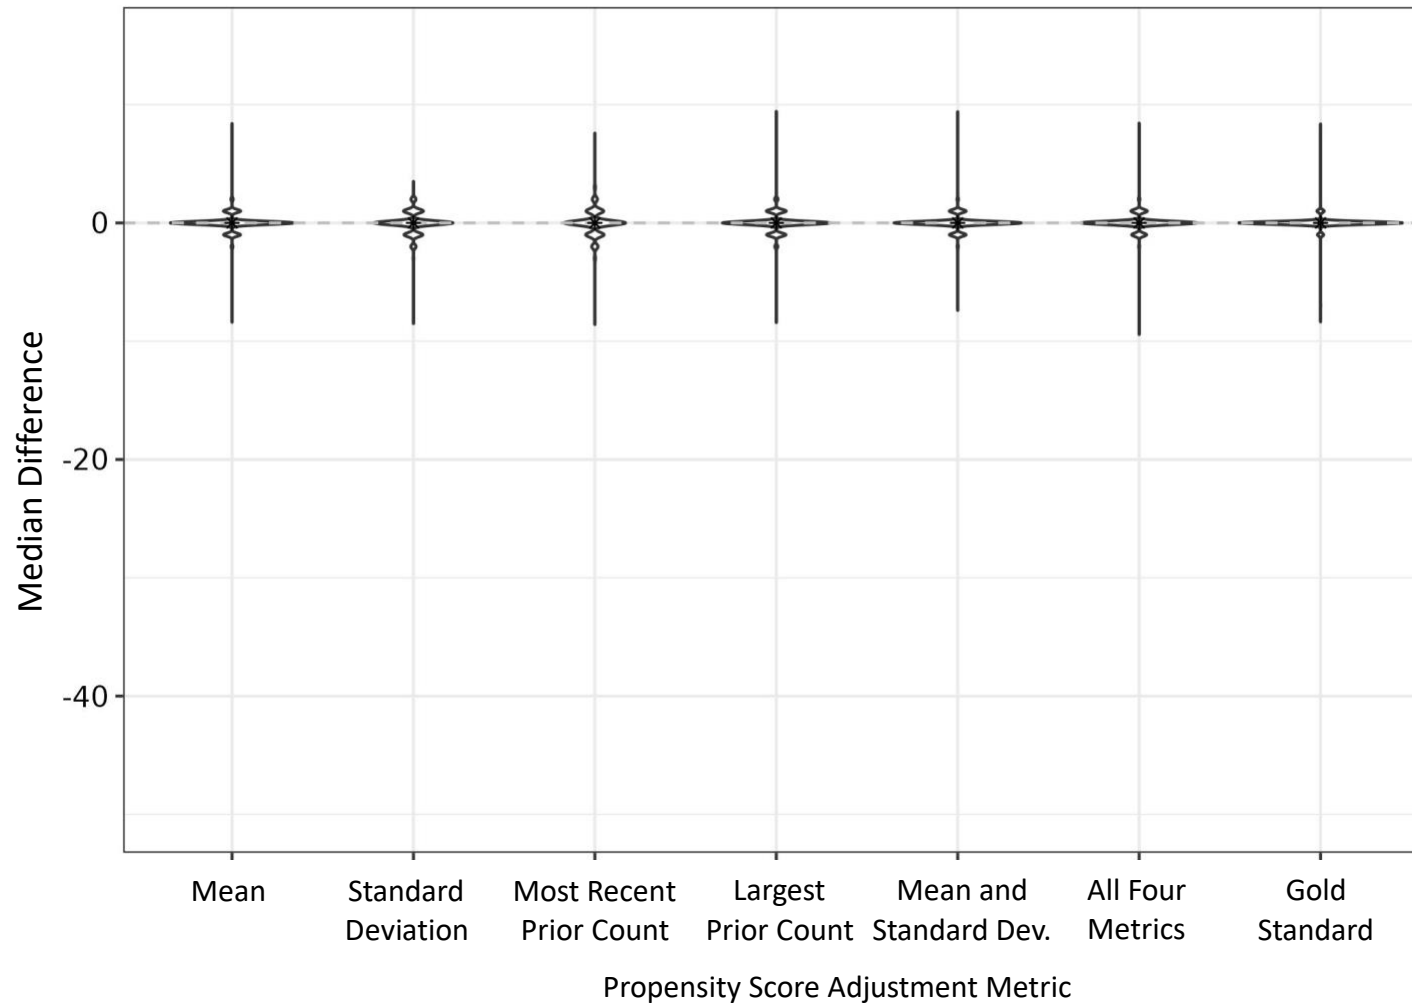

The star indicates the median of the differences between the two treatment groups' median follow-up platelet counts.

## Tables Describing the Simulation Set-Up

**Supplemental Table 1.** Name and description of the parameters varied across the six, core regression-to-the-mean (RTM) scenarios for each true treatment effect (i.e., null and non-null) and sample size (i.e., n=200 and n=10,000) combination for simulated immune-thrombocytopenia (ITP) patient data. The six core scenarios were applied to data with 2 possible true effects and 2 initial sample sizes, resulting in 24 scenarios in total.

| Scenario                                                                                                    | Mean and standard deviation pair ( $\mu_i, \sigma_i$ ) for platelet count distributions by ITP severity strata ( $i=1, 2$ ) <sup>a,b</sup> | Selection probabilities for treatment/standard-of-care <sup>c</sup> |
|-------------------------------------------------------------------------------------------------------------|--------------------------------------------------------------------------------------------------------------------------------------------|---------------------------------------------------------------------|
| B1: Weakly differential RTM with platelet counts distributions that differ disparately by ITP severity      | $\mu_1, \sigma_1$                                                                                                                          | 0.6/0.4                                                             |
| B2: Strongly differential RTM with platelet count distributions that differ disparately by ITP severity     | $\mu_1, \sigma_1$                                                                                                                          | 0.8/0.2                                                             |
| B3: Weakly differential RTM with platelet count distributions that are relatively similar by ITP severity   | $\mu_2, \sigma_2$                                                                                                                          | 0.6/0.4                                                             |
| B4: Strongly differential RTM with platelet count distributions that are relatively similar by ITP severity | $\mu_2, \sigma_2$                                                                                                                          | 0.8/0.2                                                             |
| B5: Non-differential RTM with platelet count distributions that differ disparately by ITP severity          | $\mu_1, \sigma_1$                                                                                                                          | 0.5/0.5                                                             |
| B6: Non-differential RTM with platelet count distributions that are relatively similar by ITP severity      | $\mu_2, \sigma_2$                                                                                                                          | 0.5/0.5                                                             |

<sup>a</sup>  $\mu_1, \sigma_1$  represents the mean and standard deviation pair for two platelet count distributions that differ disparately for the less-severe ( $\mu=100, \sigma=50$ ) versus more-severe ( $\mu=40, \sigma=15$ ) ITP strata.

<sup>b</sup>  $\mu_2, \sigma_2$  represents the mean and standard deviation pair for two platelet count distributions that are relatively similar for the less-severe ( $\mu=55, \sigma=20$ ) versus more-severe ( $\mu=35, \sigma=10$ ) ITP strata.

<sup>c</sup> These selection probabilities define the degree of differential RTM. 0.8/0.2 corresponds to strongly differential RTM, 0.6/0.4 to weakly differential, and 0.5/0.5 to non-differential.



## Tables Showing Descriptive Statistics of the Simulated Data

**Supplemental Table 2.** Descriptive summary of the patients simulated for the initial sample size of n=200 and a null true result. Counts are stratified by immune thrombocytopenia (ITP) severity (more- vs. less-severe) and treatment (treatment vs. standard-of-care [SOC]). Summary statistics are calculated over the 2,000 simulations generated for each scenario.

| Scenario                                                                                              | More-Severe ITP |                |                  | Less-Severe ITP |                |                  |
|-------------------------------------------------------------------------------------------------------|-----------------|----------------|------------------|-----------------|----------------|------------------|
|                                                                                                       | Treatment       | SOC            | Total            | Treatment       | SOC            | Total            |
|                                                                                                       | Median (IQR)    | Median (IQR)   | Median (IQR)     | Median (IQR)    | Median (IQR)   | Median (IQR)     |
| B1: Weakly differential RTM, Disparate platelet count distributions                                   | 60<br>(56, 64)  | 40<br>(36,44)  | 100<br>(95, 104) | 40<br>(36,44)   | 60<br>(56,64)  | 100<br>(96,105)  |
| B2: Strongly differential RTM with platelet count distributions that differ disparately ITP severity. | 80<br>(75,85)   | 20<br>(17,23)  | 100<br>(96,105)  | 20<br>(17, 23)  | 80<br>(75, 84) | 100<br>(95,104)  |
| B3: Weakly differential RTM, Similar platelet count distributions                                     | 60<br>(56, 64)  | 40<br>(36, 44) | 100<br>(95, 105) | 40<br>(36, 44)  | 60<br>(55, 64) | 100<br>(95, 105) |
| B4: Strongly differential RTM, Similar platelet count distributions                                   | 80<br>(75, 85)  | 20<br>(17, 23) | 100<br>(95, 105) | 20<br>(17, 23)  | 80<br>(75, 85) | 100<br>(95, 105) |
| B5: Non-differential RTM, Disparate platelet count distributions                                      | 50<br>(46, 54)  | 50<br>(46, 54) | 100<br>(95, 105) | 50<br>(46, 54)  | 50<br>(46, 54) | 100<br>(95, 105) |
| B6: Non-differential RTM, Similar platelet count distributions.                                       | 50<br>(46, 54)  | 50 (46, 54)    | 100<br>(95, 105) | 50<br>(46, 54)  | 50<br>(46, 54) | 100<br>(95, 105) |

Proportions were comparable for n=10,000.

**Supplemental Table 3.** Descriptive summary of the simulated immune thrombocytopenia (ITP) patient platelet count data with a true null result and initial sample size of n=200, comparing the treatment and standard-of-care (SOC) groups across six regression-to-the-mean (RTM) scenarios. Platelet count means and standard deviations (SDs) were calculated for each patient and were summarized by the median of that summary measure across participants within a scenario. These data were generated over 2,000 simulations.

| Scenario <sup>a,b</sup>                                               | Treatment Group | Platelet Count Mean                                        | SD of Platelet Counts                                      | Platelet Count Mean                                     | SD of Platelet Counts                                   |
|-----------------------------------------------------------------------|-----------------|------------------------------------------------------------|------------------------------------------------------------|---------------------------------------------------------|---------------------------------------------------------|
|                                                                       |                 | Prior to Cohort Entry <sup>c,d</sup><br>Median<br>(Q1, Q3) | Prior to Cohort Entry <sup>c,d</sup><br>Median<br>(Q1, Q3) | After Cohort Entry <sup>c,d</sup><br>Median<br>(Q1, Q3) | After Cohort Entry <sup>c,d</sup><br>Median<br>(Q1, Q3) |
| B1: Weakly differential RTM, Disparate platelet count distributions   | Treatment       | 67.76<br>(65.46, 69.94)                                    | 43.64<br>(42.22, 44.91)                                    | 64.25<br>(62.18, 66.36)                                 | 44.43<br>(43.16, 45.60)                                 |
|                                                                       | SOC             | 80.37<br>(78.08, 82.72)                                    | 47.62<br>(46.75, 48.46)                                    | 76.35<br>(74.23, 78.44)                                 | 49.02<br>(48.30, 49.67)                                 |
| B2: Strongly differential RTM, Disparate platelet count distributions | Treatment       | 54.88<br>(53.02, 56.56)                                    | 34.78<br>(32.80, 36.59)                                    | 52.04<br>(50.41, 53.75)                                 | 35.25<br>(33.39, 36.85)                                 |
|                                                                       | SOC             | 92.93<br>(90.97, 94.99)                                    | 48.09<br>(47.34, 48.88)                                    | 88.43<br>(86.61, 90.02)                                 | 50.46<br>(50.03, 50.90)                                 |
| B3: Weakly differential RTM, Similar platelet count distributions     | Treatment       | 44.85<br>(44.08, 45.60)                                    | 17.11<br>(16.67, 17.61)                                    | 43.01<br>(42.30, 43.71)                                 | 17.74<br>(17.35, 18.15)                                 |
|                                                                       | SOC             | 49.09<br>(48.26, 49.88)                                    | 18.45<br>(18.11, 18.79)                                    | 47.01<br>(46.31, 47.73)                                 | 19.34<br>(19.09, 19.60)                                 |
| B4: Strongly differential RTM, Similar platelet count distributions   | Treatment       | 40.58<br>(39.96, 41.25)                                    | 14.50<br>(13.92, 15.07)                                    | 39.00<br>(38.41, 39.59)                                 | 14.91<br>(14.39, 15.47)                                 |
|                                                                       | SOC             | 53.30<br>(52.58, 53.99)                                    | 18.79<br>(18.45, 19.09)                                    | 51.01<br>(50.43, 51.60)                                 | 20.05<br>(19.84, 20.23)                                 |
| B5: Non-differential RTM, Disparate platelet count distributions      | Treatment       | 73.77<br>(71.63, 76.09)                                    | 46.04<br>(45.04, 47.09)                                    | 70.16<br>(68.13, 72.15)                                 | 47.10<br>(46.24, 48.01)                                 |
|                                                                       | SOC             | 73.84<br>(71.69, 76.17)                                    | 46.03<br>(44.98, 47.07)                                    | 70.18<br>(68.02, 72.27)                                 | 47.12<br>(46.17, 48.03)                                 |
| B6: Non-differential RTM, Similar platelet count distributions.       | Treatment       | 46.89<br>(46.13, 47.71)                                    | 17.93<br>(17.52, 18.32)                                    | 44.98<br>(44.28, 45.75)                                 | 18.68<br>(18.34, 18.99)                                 |
|                                                                       | SOC             | 46.99<br>(46.19, 47.76)                                    | 17.94<br>(17.52, 18.37)                                    | 45.03<br>(44.35, 45.74)                                 | 18.69<br>(18.36, 18.99)                                 |

<sup>a</sup> The strength of differential RTM refers to the probabilities used to select a patient's treatment based upon their predefined ITP severity strata. Strongly differential RTM corresponds to 0.8/0.2 treatment selection probabilities, weakly differential RTM to 0.6/0.4, and non-differential to 0.5/0.5.

<sup>b</sup> Platelet counts are derived for each patient from normal distributions with a predefined mean ( $\mu$ ) and standard deviation ( $\sigma$ ). Platelet count distributions that differ disparately are defined by  $\mu=100$ ,  $\sigma=50$  for the less-severe versus  $\mu=40$ ,  $\sigma=15$  for the more-severe ITP strata. Platelet count distributions that are relatively similar are defined by  $\mu=55$ ,  $\sigma=20$  for the less-severe versus  $\mu=35$ ,  $\sigma=10$  for the more-severe ITP strata.

<sup>c</sup> The cohort entry event was defined as the first platelet count  $\leq 30 \times 10^9/L$  with at least 8 prior platelet counts.

<sup>d</sup> Statistics calculated prior to cohort entry included the 8 platelet counts measured prior to the cohort-qualifying low platelet count. Statistics estimated after cohort entry used the 23 platelet counts measured during weeks 2 through 24 after the index.

**Supplemental Table 4.** Descriptive summary of the simulated immune thrombocytopenia (ITP) patient platelet count data with a true non-null result and initial sample size of n=200, comparing the treatment and standard-of-care (SOC) groups across six regression-to-the-mean (RTM) scenarios. Platelet count means and standard deviations (SDs) were calculated for each patient and were summarized by the median of that summary measure across participants within a scenario. These data were generated over 2,000 simulations.

| Scenario <sup>a,b</sup>                                                                                    | Treatment Group | Platelet Count Mean<br>Prior to Cohort Entry <sup>c,d</sup> | SD of Platelet Counts<br>Prior to Cohort Entry <sup>c,d</sup> | Platelet Count Mean<br>After Cohort Entry <sup>c,d</sup> | SD of Platelet Counts<br>After Cohort Entry <sup>c,d</sup> |
|------------------------------------------------------------------------------------------------------------|-----------------|-------------------------------------------------------------|---------------------------------------------------------------|----------------------------------------------------------|------------------------------------------------------------|
|                                                                                                            |                 | Median<br>(Q1, Q3)                                          | Median<br>(Q1, Q3)                                            | Median<br>(Q1, Q3)                                       | Median<br>(Q1, Q3)                                         |
| B1: Weakly differential regression-to-the-mean, Disparate platelet count distributions                     | Treatment       | 67.76<br>(65.46, 69.94)                                     | 43.64<br>(42.22, 44.91)                                       | 114.25<br>(112.18, 116.36)                               | 44.43<br>(43.16, 45.60)                                    |
|                                                                                                            | SOC             | 80.37<br>(78.08, 82.72)                                     | 47.62<br>(46.75, 48.46)                                       | 76.35<br>(74.23, 78.44)                                  | 49.02<br>(48.30, 49.67)                                    |
| B2: Strongly differential RTM with platelet count distributions that differ disparately ITP severity.      | Treatment       | 54.74<br>(53.04, 56.65)                                     | 34.69<br>(32.78, 36.60)                                       | 101.94<br>(100.36, 103.71)                               | 35.13<br>(33.36, 36.88)                                    |
|                                                                                                            | SOC             | 93.22<br>(91.32, 95.27)                                     | 48.07<br>(47.35, 48.83)                                       | 88.49<br>(86.77, 90.22)                                  | 50.43<br>(49.99, 50.88)                                    |
| B3: Weakly differential RTM with platelet count distributions that are relatively similar by ITP severity. | Treatment       | 44.83<br>(44.12, 45.64)                                     | 17.13<br>(16.67, 17.60)                                       | 93.04<br>(92.33, 93.72)                                  | 17.76<br>(17.35, 18.15)                                    |
|                                                                                                            | SOC             | 49.06<br>(48.30, 49.89)                                     | 18.48<br>(18.13, 18.80)                                       | 47.04<br>(46.30, 47.75)                                  | 19.36<br>(19.08, 19.63)                                    |
| B4: Strongly differential regression-to-the-mean, Similar platelet count distributions                     | Treatment       | 40.54<br>(39.96, 41.22)                                     | 14.47<br>(13.92, 15.05)                                       | 88.95<br>(88.43, 89.56)                                  | 14.92<br>(14.38, 15.46)                                    |
|                                                                                                            | SOC             | 53.37<br>(52.65, 54.07)                                     | 18.78<br>(18.46, 19.08)                                       | 51.05<br>(50.45, 51.65)                                  | 20.04<br>(19.87, 20.25)                                    |
| B5: Non-differential regression-to-the-mean, Disparate platelet count distributions                        | Treatment       | 74.06<br>(71.73, 76.33)                                     | 46.11<br>(45.04, 47.14)                                       | 120.32<br>(118.22, 122.38)                               | 47.21<br>(46.20, 48.05)                                    |
|                                                                                                            | SOC             | 74.08<br>(71.71, 76.33)                                     | 46.11<br>(45.04, 47.13)                                       | 70.33<br>(68.12, 72.31)                                  | 47.17<br>(46.13, 48.07)                                    |
|                                                                                                            | Treatment       | 46.96<br>(46.13, 47.77)                                     | 17.93<br>(17.54, 18.31)                                       | 95.04<br>(94.32, 95.73)                                  | 18.69<br>(18.34, 19.01)                                    |

|                                                                                   |     |                         |                         |                         |                         |
|-----------------------------------------------------------------------------------|-----|-------------------------|-------------------------|-------------------------|-------------------------|
| B6: Non-differential regression-to-the-mean, Similar platelet count distributions | SOC | 46.97<br>(46.14, 47.77) | 17.94<br>(17.56, 18.35) | 45.04<br>(44.31, 45.73) | 18.70<br>(18.33, 19.02) |
|-----------------------------------------------------------------------------------|-----|-------------------------|-------------------------|-------------------------|-------------------------|

<sup>a</sup> The strength of differential RTM refers to the probabilities used to select a patient's treatment based upon their predefined ITP severity strata. Strongly differential RTM corresponds to 0.8/0.2 treatment selection probabilities, weakly differential RTM to 0.6/0.4, and non-differential to 0.5/0.5.

<sup>b</sup> Platelet counts are derived for each patient from normal distributions with a predefined mean ( $\mu$ ) and standard deviation ( $\sigma$ ). Platelet count distributions that differ disparately are defined by  $\mu=100$ ,  $\sigma=50$  for the less-severe versus  $\mu=40$ ,  $\sigma=15$  for the more-severe ITP strata. Platelet count distributions that are relatively similar are defined by  $\mu=55$ ,  $\sigma=20$  for the less-severe versus  $\mu=35$ ,  $\sigma=10$  for the more-severe ITP strata.

<sup>c</sup> The cohort entry event was defined as the first platelet count  $\leq 30 \times 10^9/L$  with at least 8 prior platelet counts.

<sup>d</sup> Statistics calculated prior to cohort entry included the 8 platelet counts measured prior to the cohort-qualifying low platelet count. Statistics estimated after cohort entry used the 23 platelet counts measured during weeks 2 through 24 after the index.

**Supplemental Table 5.** Descriptive summary of the simulated immune thrombocytopenia (ITP) patient platelet count data with a true null result and initial sample size of n=10,000, comparing the treatment and standard-of-care (SOC) groups across six regression-to-the-mean (RTM) scenarios. Platelet count means and standard deviations (SDs) were calculated for each patient and were summarized by the median of that summary measure across participants within a scenario. These data were generated over 2,000 simulations.

| Scenario <sup>a,b</sup>                                                                                    | Treatment Group | Platelet Count Mean Prior to Cohort Entry <sup>c,d</sup><br>Median<br>(Q1, Q3) | SD of Platelet Counts Prior to Cohort Entry <sup>c,d</sup><br>Median<br>(Q1, Q3) | Platelet Count Mean After Cohort Entry <sup>c,d</sup><br>Median<br>(Q1, Q3) | SD of Platelet Counts After Cohort Entry <sup>c,d</sup><br>Median<br>(Q1, Q3) |
|------------------------------------------------------------------------------------------------------------|-----------------|--------------------------------------------------------------------------------|----------------------------------------------------------------------------------|-----------------------------------------------------------------------------|-------------------------------------------------------------------------------|
| B1: Weakly differential regression-to-the-mean, Disparate platelet count distributions                     | Treatment       | 67.68<br>(66.65, 68.62)                                                        | 43.70<br>(43.09, 44.26)                                                          | 64.21<br>(63.31, 65.12)                                                     | 44.40<br>(43.87, 44.94)                                                       |
|                                                                                                            | SOC             | 80.37<br>(79.34, 81.37)                                                        | 47.71<br>(47.30, 48.08)                                                          | 76.24<br>(75.37, 77.22)                                                     | 49.04<br>(48.74, 49.33)                                                       |
| B2: Strongly differential RTM with platelet count distributions that differ disparately ITP severity.      | Treatment       | 54.95<br>(54.07, 55.73)                                                        | 34.87<br>(34.03, 35.70)                                                          | 52.10<br>(51.37, 52.87)                                                     | 35.25<br>(34.45, 36.07)                                                       |
|                                                                                                            | SOC             | 93.12<br>(92.20, 94.01)                                                        | 48.14<br>(47.79, 48.48)                                                          | 88.36<br>(87.60, 89.18)                                                     | 50.47<br>(50.28, 50.66)                                                       |
| B3: Weakly differential RTM with platelet count distributions that are relatively similar by ITP severity. | Treatment       | 44.84<br>(44.50, 45.17)                                                        | 17.16<br>(16.96, 17.36)                                                          | 43.02<br>(42.71, 43.33)                                                     | 17.76<br>(17.59, 17.94)                                                       |
|                                                                                                            | SOC             | 49.09<br>(48.72, 49.45)                                                        | 18.48<br>(18.32, 18.64)                                                          | 47.00<br>(46.71, 47.34)                                                     | 19.36<br>(19.24, 19.48)                                                       |
| B4: Strongly differential regression-to-the-mean, Similar platelet count distributions                     | Treatment       | 40.61<br>(40.31, 40.89)                                                        | 14.51<br>(14.27, 14.78)                                                          | 39.01<br>(38.75, 39.27)                                                     | 14.96<br>(14.73, 15.19)                                                       |
|                                                                                                            | SOC             | 53.34<br>(53.02, 53.65)                                                        | 18.79<br>(18.65, 18.93)                                                          | 51.02<br>(50.75, 51.29)                                                     | 20.06<br>(19.97, 20.15)                                                       |
| B5: Non-differential regression-to-the-mean, Disparate platelet count distributions                        | Treatment       | 74.05<br>(72.97, 75.04)                                                        | 46.18<br>(45.71, 46.66)                                                          | 70.25<br>(69.29, 71.21)                                                     | 47.19<br>(46.75, 47.59)                                                       |
|                                                                                                            | SOC             | 73.97<br>(72.97, 75.00)                                                        | 46.18<br>(45.69, 46.64)                                                          | 70.19<br>(69.31, 71.15)                                                     | 47.13<br>(46.72, 47.55)                                                       |
| B6: Non-differential regression-to-the-mean, Similar platelet count distributions                          | Treatment       | 46.96<br>(46.60, 47.34)                                                        | 17.96<br>(17.78, 18.14)                                                          | 45.01<br>(44.69, 45.34)                                                     | 18.70<br>(18.54, 18.84)                                                       |
|                                                                                                            | SOC             | 46.95<br>(46.61, 47.32)                                                        | 17.96<br>(17.77, 18.14)                                                          | 45.01<br>(44.70, 45.32)                                                     | 18.67<br>(18.53, 18.82)                                                       |

<sup>a</sup> The strength of differential RTM refers to the probabilities used to select a patient's treatment based upon their predefined ITP severity strata. Strongly differential RTM corresponds to 0.8/0.2 treatment selection probabilities, weakly differential RTM to 0.6/0.4, and non-differential to 0.5/0.5.

<sup>b</sup> Platelet counts are derived for each patient from normal distributions with a predefined mean ( $\mu$ ) and standard deviation ( $\sigma$ ). Platelet count distributions that differ disparately are defined by  $\mu=100$ ,  $\sigma=50$  for the less-severe versus  $\mu=40$ ,  $\sigma=15$  for the more-severe ITP strata. Platelet count distributions that are relatively similar are defined by  $\mu=55$ ,  $\sigma=20$  for the less-severe versus  $\mu=35$ ,  $\sigma=10$  for the more-severe ITP strata.

<sup>c</sup> The cohort entry event was defined as the first platelet count  $\leq 30 \times 10^9/L$  with at least 8 prior platelet counts.

<sup>d</sup> Statistics calculated prior to cohort entry included the 8 platelet counts measured prior to the cohort-qualifying low platelet count. Statistics estimated after cohort entry used the 23 platelet counts measured during weeks 2 through 24 after the index.



**Supplemental Table 6.** Descriptive summary of the simulated immune thrombocytopenia (ITP) patient platelet count data with a true non-null result and initial sample size of n=10,000, comparing the treatment and standard-of-care (SOC) groups across six regression-to-the-mean (RTM) scenarios. Platelet count means and standard deviations (SDs) were calculated for each patient and were summarized by the median of that summary measure across participants within a scenario. These data were generated over 2,000 simulations.

| Scenario <sup>a,b</sup>                                                                                    | Treatment Group | Platelet Count Mean                                        | SD of Platelet Counts                                      | Platelet Count Mean                                     | SD of Platelet Counts                                   |
|------------------------------------------------------------------------------------------------------------|-----------------|------------------------------------------------------------|------------------------------------------------------------|---------------------------------------------------------|---------------------------------------------------------|
|                                                                                                            |                 | Prior to Cohort Entry <sup>c,d</sup><br>Median<br>(Q1, Q3) | Prior to Cohort Entry <sup>c,d</sup><br>Median<br>(Q1, Q3) | After Cohort Entry <sup>c,d</sup><br>Median<br>(Q1, Q3) | After Cohort Entry <sup>c,d</sup><br>Median<br>(Q1, Q3) |
| B1: Weakly differential regression-to-the-mean, Disparate platelet count distributions                     | Treatment       | 67.68<br>(66.65, 68.62)                                    | 43.70<br>(43.09, 44.26)                                    | 114.21<br>(113.31, 115.12)                              | 44.40<br>(43.87, 44.94)                                 |
|                                                                                                            | SOC             | 80.37<br>(79.34, 81.37)                                    | 47.71<br>(47.30, 48.08)                                    | 76.24<br>(75.37, 77.22)                                 | 49.04<br>(48.74, 49.33)                                 |
| B2: Strongly differential RTM with platelet count distributions that differ disparately ITP severity.      | Treatment       | 54.95<br>(54.07, 55.73)                                    | 34.87<br>(34.03, 35.70)                                    | 102.10<br>(101.37, 102.87)                              | 35.25<br>(34.45, 36.07)                                 |
|                                                                                                            | SOC             | 93.12<br>(92.20, 94.01)                                    | 48.14<br>(47.79, 48.48)                                    | 88.36<br>(87.60, 89.18)                                 | 50.47<br>(50.28, 50.66)                                 |
| B3: Weakly differential RTM with platelet count distributions that are relatively similar by ITP severity. | Treatment       | 44.84<br>(44.50, 45.17)                                    | 17.16<br>(16.96, 17.36)                                    | 93.02<br>(92.71, 93.33)                                 | 17.76<br>(17.59, 17.94)                                 |
|                                                                                                            | SOC             | 49.09<br>(48.72, 49.45)                                    | 18.48<br>(18.32, 18.64)                                    | 47.00<br>(46.71, 47.34)                                 | 19.36<br>(19.24, 19.48)                                 |
| B4: Strongly differential regression-to-the-mean, Similar platelet count distributions                     | Treatment       | 40.61<br>(40.31, 40.89)                                    | 14.51<br>(14.27, 14.78)                                    | 89.01<br>(88.75, 89.27)                                 | 14.96<br>(14.73, 15.19)                                 |
|                                                                                                            | SOC             | 53.34<br>(53.02, 53.65)                                    | 18.79<br>(18.65, 18.93)                                    | 51.02<br>(50.75, 51.29)                                 | 20.06<br>(19.97, 20.15)                                 |
| B5: Non-differential regression-to-the-mean, Disparate platelet count distributions                        | Treatment       | 74.05<br>(72.97, 75.04)                                    | 46.18<br>(45.71, 46.66)                                    | 120.25<br>(119.29, 121.21)                              | 47.19<br>(46.75, 47.59)                                 |
|                                                                                                            | SOC             | 73.97<br>(72.97, 75.00)                                    | 46.18<br>(45.69, 46.64)                                    | 70.19<br>(69.31, 71.15)                                 | 47.13<br>(46.72, 47.55)                                 |
| B6: Non-differential regression-to-the-mean, Similar platelet count distributions                          | Treatment       | 46.96<br>(46.60, 47.34)                                    | 17.96<br>(17.78, 18.14)                                    | 95.01<br>(94.69, 95.34)                                 | 18.70<br>(18.54, 18.84)                                 |
|                                                                                                            | SOC             | 46.95<br>(46.61, 47.32)                                    | 17.96<br>(17.77, 18.14)                                    | 45.01<br>(44.70, 45.32)                                 | 18.67<br>(18.53, 18.82)                                 |

<sup>a</sup> The strength of differential RTM refers to the probabilities used to select a patient's treatment based upon their predefined ITP severity strata. Strongly differential RTM corresponds to 0.8/0.2 treatment selection probabilities, weakly differential RTM to 0.6/0.4, and non-differential to 0.5/0.5.

<sup>b</sup> Platelet counts are derived for each patient from normal distributions with a predefined mean ( $\mu$ ) and standard deviation ( $\sigma$ ). Platelet count distributions that differ disparately are defined by  $\mu=100$ ,  $\sigma=50$  for the less-severe versus  $\mu=40$ ,  $\sigma=15$  for the more-severe ITP strata. Platelet count distributions that are relatively similar are defined by  $\mu=55$ ,  $\sigma=20$  for the less-severe versus  $\mu=35$ ,  $\sigma=10$  for the more-severe ITP strata.

<sup>c</sup> The cohort entry event was defined as the first platelet count  $\leq 30 \times 10^9/L$  with at least 8 prior platelet counts.

<sup>d</sup> Statistics calculated prior to cohort entry included the 8 platelet counts measured prior to the cohort-qualifying low platelet count. Statistics estimated after cohort entry used the 23 platelet counts measured during weeks 2 through 24 after the index.

## Tables Displaying Simulation Performance Measures

**Supplemental Table 7.** Simulation performance measures for the difference in median platelet count over the two treatment groups across all the scenarios with n=200 and a true non-null treatment effect. Measures were calculated over 2,000 simulated cohorts for each scenario.

| Scenario <sup>a,b</sup>                                                                  | Adjustment Metric for Underlying ITP Severity                                  | Bias<br>(95% confidence interval) | Percent Change in Absolute Bias (%) | Empirical Standard Error | Mean Square Error |
|------------------------------------------------------------------------------------------|--------------------------------------------------------------------------------|-----------------------------------|-------------------------------------|--------------------------|-------------------|
| B1: Weakly differential regression-to-the-mean, Disparate platelet count distributions   | (1) No Adjustment                                                              | -7.47<br>(-10.58, -4.36)          | REF                                 | 70.97                    | 5089.83           |
|                                                                                          | (2) Platelet count mean prior to cohort entry                                  | -1.64<br>(-1.73, -1.55)           | -78%                                | 2.16                     | 7.36              |
|                                                                                          | (3) Platelet count standard deviation prior to cohort entry                    | -3.05<br>(-3.17, -2.93)           | -59%                                | 2.73                     | 16.76             |
|                                                                                          | (4) Difference between most recent prior platelet count and cohort entry event | -5.75<br>(-5.91, -5.59)           | -23%                                | 3.76                     | 47.18             |
|                                                                                          | (5) Difference between largest prior platelet count and cohort entry event     | -1.75<br>(-1.85, -1.65)           | -77%                                | 2.21                     | 7.93              |
|                                                                                          | (6) Platelet count mean and standard deviation prior to cohort entry           | -1.29<br>(-1.38, -1.20)           | -83%                                | 2.01                     | 5.71              |
|                                                                                          | (7) All summary measures calculated prior to cohort entry                      | -1.20<br>(-1.28, -1.12)           | -84%                                | 1.91                     | 5.10              |
|                                                                                          | (8) Gold standard                                                              | 0<br>(-0.08, 0.08)                | -100%                               | 1.83                     | 3.35              |
| B2: Strongly differential regression-to-the-mean, Disparate platelet count distributions | (1) No Adjustment                                                              | -33.05<br>(-36.41, -29.69)        | REF                                 | 76.61                    | 6959.15           |
|                                                                                          | (2) Platelet count mean prior to cohort entry                                  | -6.70<br>(-6.90, -6.50)           | -80%                                | 4.50                     | 65.16             |
|                                                                                          | (3) Platelet count standard deviation prior to cohort entry                    | -12.98<br>(-13.26, -12.70)        | -61%                                | 6.44                     | 210.03            |
|                                                                                          | (4) Difference between most recent prior platelet count and cohort entry event | -23.60<br>(-23.92, -23.28)        | -29%                                | 7.22                     | 608.97            |
|                                                                                          | (5) Difference between largest prior platelet count and cohort entry event     | -7.25<br>(-7.46, -7.04)           | -78%                                | 4.85                     | 76.05             |
|                                                                                          | (6) Platelet count mean and standard deviation prior to cohort entry           | -5.51<br>(-5.68, -5.34)           | -83%                                | 3.90                     | 45.54             |
|                                                                                          | (7) All summary measures calculated prior to cohort entry                      | -5.19<br>(-5.37, -5.01)           | -84%                                | 4.15                     | 44.14             |
|                                                                                          | (8) Gold standard                                                              | -0.02                             | -100%                               | 1.94                     | 3.75              |

| Scenario <sup>a,b</sup>                                                                                   | Adjustment Metric for Underlying ITP Severity                                  | Bias<br>(95% confidence<br>interval) | Percent<br>Change in<br>Absolute Bias<br>(%) | Empirical<br>Standard<br>Error | Mean<br>Square<br>Error |
|-----------------------------------------------------------------------------------------------------------|--------------------------------------------------------------------------------|--------------------------------------|----------------------------------------------|--------------------------------|-------------------------|
|                                                                                                           |                                                                                | (-0.11, 0.07)                        |                                              |                                |                         |
| B3: Weakly<br>differential<br>regression-to-<br>the-mean,<br>Similar platelet<br>count<br>distributions   | (1) No Adjustment                                                              | -3.30<br>(-4.53, -2.07)              | REF                                          | 28.13                          | 801.93                  |
|                                                                                                           | (2) Platelet count mean prior to cohort entry                                  | -0.87<br>(-0.91, -0.83)              | -74%                                         | 0.95                           | 1.65                    |
|                                                                                                           | (3) Platelet count standard deviation prior to cohort entry                    | -1.99<br>(-2.05, -1.93)              | -40%                                         | 1.26                           | 5.56                    |
|                                                                                                           | (4) Difference between most recent prior platelet count and cohort entry event | -2.66<br>(-2.72, -2.60)              | -19%                                         | 1.34                           | 8.87                    |
|                                                                                                           | (5) Difference between largest prior platelet count and cohort entry event     | -1.18<br>(-1.23, -1.13)              | -64%                                         | 1.03                           | 2.46                    |
|                                                                                                           | (6) Platelet count mean and standard deviation prior to cohort entry           | -0.75<br>(-0.79, -0.71)              | -77%                                         | 0.96                           | 1.48                    |
|                                                                                                           | (7) All summary measures calculated prior to cohort entry                      | -0.71<br>(-0.75, -0.67)              | -78%                                         | 0.92                           | 1.34                    |
|                                                                                                           | (8) Gold standard                                                              | -0.02<br>(-0.05, 0.01)               | -99%                                         | 0.61                           | 0.37                    |
| B4: Strongly<br>differential<br>regression-to-<br>the-mean,<br>Similar platelet<br>count<br>distributions | (1) No Adjustment                                                              | -13.09<br>(-14.38, -11.80)           | REF                                          | 29.47                          | 1039.26                 |
|                                                                                                           | (2) Platelet count mean prior to cohort entry                                  | -3.14<br>(-3.23, -3.05)              | -76%                                         | 1.99                           | 13.81                   |
|                                                                                                           | (3) Platelet count standard deviation prior to cohort entry                    | -7.02<br>(-7.12, -6.92)              | -46%                                         | 2.20                           | 54.1                    |
|                                                                                                           | (4) Difference between most recent prior platelet count and cohort entry event | -8.79<br>(-8.87, -8.71)              | -33%                                         | 1.85                           | 80.63                   |
|                                                                                                           | (5) Difference between largest prior platelet count and cohort entry event     | -4.54<br>(-4.64, -4.44)              | -65%                                         | 2.21                           | 25.45                   |
|                                                                                                           | (6) Platelet count mean and standard deviation prior to cohort entry           | -2.85<br>(-2.93, -2.77)              | -78%                                         | 1.93                           | 11.86                   |
|                                                                                                           | (7) All summary measures calculated prior to cohort entry                      | -2.71<br>(-2.80, -2.62)              | -79%                                         | 2.01                           | 11.39                   |
|                                                                                                           | (8) Gold standard                                                              | -0.03<br>(-0.07, 0.01)               | -100%                                        | 0.84                           | 0.71                    |

| Scenario <sup>a,b</sup>                                                             | Adjustment Metric for Underlying ITP Severity                                  | Bias<br>(95% confidence<br>interval) | Percent<br>Change in<br>Absolute Bias<br>(%) | Empirical<br>Standard<br>Error | Mean<br>Square<br>Error |
|-------------------------------------------------------------------------------------|--------------------------------------------------------------------------------|--------------------------------------|----------------------------------------------|--------------------------------|-------------------------|
| B5: Non-differential regression-to-the-mean, Disparate platelet count distributions | (1) No Adjustment                                                              | -0.31<br>(-3.36, 2.74)               | REF                                          | 69.57                          | 4837.68                 |
|                                                                                     | (2) Platelet count mean prior to cohort entry                                  | 0.02<br>(-0.08, 0.12)                | -94%                                         | 2.24                           | 5.01                    |
|                                                                                     | (3) Platelet count standard deviation prior to cohort entry                    | 0.04<br>(-0.08, 0.16)                | -87%                                         | 2.68                           | 7.19                    |
|                                                                                     | (4) Difference between most recent prior platelet count and cohort entry event | 0.05<br>(-0.09, 0.19)                | -84%                                         | 3.30                           | 10.91                   |
|                                                                                     | (5) Difference between largest prior platelet count and cohort entry event     | 0.03<br>(-0.07, 0.13)                | -90%                                         | 2.34                           | 5.48                    |
|                                                                                     | (6) Platelet count mean and standard deviation prior to cohort entry           | 0.03<br>(-0.06, 0.12)                | -90%                                         | 2.06                           | 4.23                    |
|                                                                                     | (7) All summary measures calculated prior to cohort entry                      | 0.05<br>(-0.04, 0.14)                | -84%                                         | 1.95                           | 3.82                    |
|                                                                                     | (8) Gold standard                                                              | 0.03<br>(-0.03, 0.09)                | -90%                                         | 1.34                           | 1.78                    |
| B6: Non-differential regression-to-the-mean, Similar platelet count distributions   | (1) No Adjustment                                                              | -0.06<br>(-1.29, 1.17)               | REF                                          | 27.98                          | 782.46                  |
|                                                                                     | (2) Platelet count mean prior to cohort entry                                  | -0.02<br>(-0.06, 0.02)               | -67%                                         | 0.97                           | 0.93                    |
|                                                                                     | (3) Platelet count standard deviation prior to cohort entry                    | 0.00<br>(-0.05, 0.05)                | -100%                                        | 1.22                           | 1.49                    |
|                                                                                     | (4) Difference between most recent prior platelet count and cohort entry event | 0.00<br>(-0.06, 0.06)                | -100%                                        | 1.41                           | 2.00                    |
|                                                                                     | (5) Difference between largest prior platelet count and cohort entry event     | 0.00<br>(-0.05, 0.05)                | -100%                                        | 1.04                           | 1.08                    |
|                                                                                     | (6) Platelet count mean and standard deviation prior to cohort entry           | -0.01<br>(-0.05, 0.03)               | -83%                                         | 0.91                           | 0.83                    |
|                                                                                     | (7) All summary measures calculated prior to cohort entry                      | 0.01<br>(-0.03, 0.05)                | -83%                                         | 0.88                           | 0.77                    |
|                                                                                     | (8) Gold standard                                                              | -0.03<br>(-0.06, 0.00)               | -50%                                         | 0.69                           | 0.48                    |

<sup>a</sup> The strength of differential RTM refers to the probabilities used to select a patient's treatment based upon their predefined ITP severity strata. Strongly differential RTM corresponds to 0.8/0.2 treatment selection probabilities, weakly differential RTM to 0.6/0.4, and non-differential to 0.5/0.5.

<sup>b</sup> Platelet counts are derived for each patient from normal distributions with a predefined mean ( $\mu$ ) and standard deviation ( $\sigma$ ). Platelet count distributions that differ disparately are defined by  $\mu=100$ ,  $\sigma=50$  for the less-severe versus  $\mu=40$ ,  $\sigma=15$  for the more-severe ITP strata. Platelet count distributions that are relatively similar are defined by  $\mu=55$ ,  $\sigma=20$  for the less-severe versus  $\mu=35$ ,  $\sigma=10$  for the more-severe ITP strata.

**Supplemental Table 8.** Simulation performance measures for the difference in median platelet count over the two treatment groups across all the scenarios with n=10,000 and a true null treatment effect. Measures were calculated over 2,000 simulated cohorts for each scenario.

| Scenario <sup>a,b</sup>                                                                  | Adjustment Metric for Underlying ITP Severity                                  | Bias<br>(95% confidence interval) | Percent Change in Absolute Bias (%) | Empirical Standard Error | Mean Square Error |
|------------------------------------------------------------------------------------------|--------------------------------------------------------------------------------|-----------------------------------|-------------------------------------|--------------------------|-------------------|
| B1: Weakly differential regression-to-the-mean, Disparate platelet count distributions   | (1) No Adjustment                                                              | -8.86<br>(-12.03, -5.69)          | REF                                 | 72.26                    | 5296.94           |
|                                                                                          | (2) Platelet count mean prior to cohort entry                                  | -1.47<br>(-1.52, -1.42)           | -83%                                | 1.11                     | 3.37              |
|                                                                                          | (3) Platelet count standard deviation prior to cohort entry                    | -2.95<br>(-3.01, -2.89)           | -67%                                | 1.33                     | 10.48             |
|                                                                                          | (4) Difference between most recent prior platelet count and cohort entry event | -5.59<br>(-5.66, -5.52)           | -37%                                | 1.54                     | 33.62             |
|                                                                                          | (5) Difference between largest prior platelet count and cohort entry event     | -1.65<br>(-1.7, -1.60)            | -81%                                | 1.15                     | 4.05              |
|                                                                                          | (6) Platelet count mean and standard deviation prior to cohort entry           | -1.20<br>(-1.24, -1.16)           | -86%                                | 0.90                     | 2.25              |
|                                                                                          | (7) All summary measures calculated prior to cohort entry                      | -1.19<br>(-1.24, -1.14)           | -87%                                | 1.15                     | 2.73              |
|                                                                                          | (8) Gold standard                                                              | 0.01<br>(-0.02, 0.04)             | -100%                               | 0.71                     | 0.51              |
| B2: Strongly differential regression-to-the-mean, Disparate platelet count distributions | (1) No Adjustment                                                              | -26.59<br>(-29.98, -23.2)         | REF                                 | 77.24                    | 6669.52           |
|                                                                                          | (2) Platelet count mean prior to cohort entry                                  | -6.24<br>(-6.32, -6.16)           | -77%                                | 1.87                     | 42.49             |
|                                                                                          | (3) Platelet count standard deviation prior to cohort entry                    | -12.55<br>(-12.67, -12.43)        | -53%                                | 2.71                     | 164.97            |
|                                                                                          | (4) Difference between most recent prior platelet count and cohort entry event | -23.53<br>(-23.67, -23.39)        | -12%                                | 3.24                     | 564.14            |
|                                                                                          | (5) Difference between largest prior platelet count and cohort entry event     | -6.74<br>(-6.82, -6.66)           | -75%                                | 1.88                     | 48.93             |
|                                                                                          | (6) Platelet count mean and standard deviation prior to cohort entry           | -5.21<br>(-5.28, -5.14)           | -80%                                | 1.61                     | 29.73             |
|                                                                                          | (7) All summary measures calculated prior to cohort entry                      | -5.05<br>(-5.13, -4.97)           | -81%                                | 1.73                     | 28.49             |
|                                                                                          | (8) Gold standard                                                              | 0.02                              | -100%                               | 0.91                     | 0.83              |



| Scenario <sup>a,b</sup>                                                                                   | Adjustment Metric for Underlying ITP Severity                                  | Bias<br>(95% confidence<br>interval)<br>(-0.02, 0.06) | Percent<br>Change in<br>Absolute Bias<br>(%) | Empirical<br>Standard<br>Error | Mean<br>Square<br>Error |
|-----------------------------------------------------------------------------------------------------------|--------------------------------------------------------------------------------|-------------------------------------------------------|----------------------------------------------|--------------------------------|-------------------------|
| B3: Weakly<br>differential<br>regression-to-<br>the-mean,<br>Similar platelet<br>count<br>distributions   | (1) No Adjustment                                                              | -3.31<br>(-4.56, -2.06)                               | REF                                          | 28.59                          | 828.01                  |
|                                                                                                           | (2) Platelet count mean prior to cohort entry                                  | -0.83<br>(-0.85, -0.81)                               | -75%                                         | 0.55                           | 0.99                    |
|                                                                                                           | (3) Platelet count standard deviation prior to cohort entry                    | -1.96<br>(-1.99, -1.93)                               | -41%                                         | 0.61                           | 4.21                    |
|                                                                                                           | (4) Difference between most recent prior platelet count and cohort entry event | -2.63<br>(-2.66, -2.60)                               | -21%                                         | 0.68                           | 7.35                    |
|                                                                                                           | (5) Difference between largest prior platelet count and cohort entry event     | -1.18<br>(-1.21, -1.15)                               | -64%                                         | 0.62                           | 1.76                    |
|                                                                                                           | (6) Platelet count mean and standard deviation prior to cohort entry           | -0.73<br>(-0.76, -0.70)                               | -78%                                         | 0.68                           | 1.00                    |
|                                                                                                           | (7) All summary measures calculated prior to cohort entry                      | -0.72<br>(-0.74, -0.70)                               | -78%                                         | 0.57                           | 0.84                    |
|                                                                                                           | (8) Gold standard                                                              | 0.00<br>(-0.03, 0.03)                                 | -100%                                        | 0.59                           | 0.35                    |
| B4: Strongly<br>differential<br>regression-to-<br>the-mean,<br>Similar platelet<br>count<br>distributions | (1) No Adjustment                                                              | -10.75<br>(-12.11, -9.39)                             | REF                                          | 31.05                          | 1079.24                 |
|                                                                                                           | (2) Platelet count mean prior to cohort entry                                  | -3.01<br>(-3.05, -2.97)                               | -72%                                         | 0.89                           | 9.84                    |
|                                                                                                           | (3) Platelet count standard deviation prior to cohort entry                    | -7.01<br>(-7.05, -6.97)                               | -35%                                         | 0.97                           | 50.07                   |
|                                                                                                           | (4) Difference between most recent prior platelet count and cohort entry event | -8.72<br>(-8.76, -8.68)                               | -19%                                         | 0.81                           | 76.71                   |
|                                                                                                           | (5) Difference between largest prior platelet count and cohort entry event     | -4.44<br>(-4.48, -4.40)                               | -59%                                         | 0.96                           | 20.64                   |
|                                                                                                           | (6) Platelet count mean and standard deviation prior to cohort entry           | -2.76<br>(-2.80, -2.72)                               | -74%                                         | 0.88                           | 8.40                    |
|                                                                                                           | (7) All summary measures calculated prior to cohort entry                      | -2.72<br>(-2.76, -2.68)                               | -75%                                         | 0.84                           | 8.08                    |
|                                                                                                           | (8) Gold standard                                                              | 0.00<br>(-0.02, 0.02)                                 | -100%                                        | 0.36                           | 0.13                    |

| Scenario <sup>a,b</sup>                                                             | Adjustment Metric for Underlying ITP Severity                                  | Bias<br>(95% confidence<br>interval) | Percent<br>Change in<br>Absolute Bias<br>(%) | Empirical<br>Standard<br>Error | Mean<br>Square<br>Error |
|-------------------------------------------------------------------------------------|--------------------------------------------------------------------------------|--------------------------------------|----------------------------------------------|--------------------------------|-------------------------|
| B5: Non-differential regression-to-the-mean, Disparate platelet count distributions | (1) No Adjustment                                                              | -2.48<br>(-5.66, 0.70)               | REF                                          | 72.53                          | 5264.39                 |
|                                                                                     | (2) Platelet count mean prior to cohort entry                                  | 0.01<br>(-0.04, 0.06)                | -100%                                        | 1.20                           | 1.44                    |
|                                                                                     | (3) Platelet count standard deviation prior to cohort entry                    | -0.03<br>(-0.09, 0.03)               | -99%                                         | 1.28                           | 1.64                    |
|                                                                                     | (4) Difference between most recent prior platelet count and cohort entry event | 0.03<br>(-0.04, 0.10)                | -99%                                         | 1.54                           | 2.37                    |
|                                                                                     | (5) Difference between largest prior platelet count and cohort entry event     | 0.00<br>(-0.05, 0.05)                | -100%                                        | 1.03                           | 1.06                    |
|                                                                                     | (6) Platelet count mean and standard deviation prior to cohort entry           | 0.00<br>(-0.04, 0.04)                | -100%                                        | 1.01                           | 1.03                    |
|                                                                                     | (7) All summary measures calculated prior to cohort entry                      | 0.00<br>(-0.05, 0.05)                | -100%                                        | 1.18                           | 1.39                    |
|                                                                                     | (8) Gold standard                                                              | -0.03<br>(-0.06, 0.00)               | -99%                                         | 0.74                           | 0.55                    |
| B6: Non-differential regression-to-the-mean, Similar platelet count distributions   | (1) No Adjustment                                                              | -0.97<br>(-2.24, 0.30)               | REF                                          | 28.87                          | 834.04                  |
|                                                                                     | (2) Platelet count mean prior to cohort entry                                  | 0.01<br>(-0.01, 0.03)                | -99%                                         | 0.50                           | 0.25                    |
|                                                                                     | (3) Platelet count standard deviation prior to cohort entry                    | -0.01<br>(-0.03, 0.01)               | -99%                                         | 0.55                           | 0.30                    |
|                                                                                     | (4) Difference between most recent prior platelet count and cohort entry event | 0.01<br>(-0.02, 0.04)                | -99%                                         | 0.61                           | 0.37                    |
|                                                                                     | (5) Difference between largest prior platelet count and cohort entry event     | 0.00<br>(-0.02, 0.02)                | -100%                                        | 0.50                           | 0.25                    |
|                                                                                     | (6) Platelet count mean and standard deviation prior to cohort entry           | 0.03<br>(0.00, 0.06)                 | -97%                                         | 0.66                           | 0.44                    |
|                                                                                     | (7) All summary measures calculated prior to cohort entry                      | 0.01<br>(-0.01, 0.03)                | -99%                                         | 0.49                           | 0.24                    |
|                                                                                     | (8) Gold standard                                                              | -0.01<br>(-0.03, 0.01)               | -99%                                         | 0.37                           | 0.13                    |

<sup>a</sup> The strength of differential RTM refers to the probabilities used to select a patient's treatment based upon their predefined ITP severity strata. Strongly differential RTM corresponds to 0.8/0.2 treatment selection probabilities, weakly differential RTM to 0.6/0.4, and non-differential to 0.5/0.5.

<sup>b</sup> Platelet counts are derived for each patient from normal distributions with a predefined mean ( $\mu$ ) and standard deviation ( $\sigma$ ). Platelet count distributions that differ disparately are defined by  $\mu=100$ ,  $\sigma=50$  for the less-severe versus  $\mu=40$ ,  $\sigma=15$  for the more-severe ITP strata. Platelet count distributions that are relatively similar are defined by  $\mu=55$ ,  $\sigma=20$  for the less-severe versus  $\mu=35$ ,  $\sigma=10$  for the more-severe ITP strata.

**Supplemental Table 9.** Simulation performance measures for the difference in median platelet count over the two treatment groups across all the scenarios with n=10,000 and a true non-null treatment effect. Measures were calculated over 2,000 simulated cohorts for each scenario.

| Scenario <sup>a,b</sup>                                                                  | Adjustment Metric for Underlying ITP Severity                                  | Bias<br>(95% confidence interval) | Percent Change in Absolute Bias (%) | Empirical Standard Error | Mean Square Error |
|------------------------------------------------------------------------------------------|--------------------------------------------------------------------------------|-----------------------------------|-------------------------------------|--------------------------|-------------------|
| B1: Weakly differential regression-to-the-mean, Disparate platelet count distributions   | (1) No Adjustment                                                              | -8.53<br>(-11.70, -5.36)          | REF                                 | 72.41                    | 5313.43           |
|                                                                                          | (2) Platelet count mean prior to cohort entry                                  | -1.47<br>(-1.52, -1.42)           | -83%                                | 1.20                     | 3.59              |
|                                                                                          | (3) Platelet count standard deviation prior to cohort entry                    | -2.90<br>(-2.98, -2.82)           | -66%                                | 1.85                     | 11.87             |
|                                                                                          | (4) Difference between most recent prior platelet count and cohort entry event | -5.60<br>(-5.67, -5.53)           | -34%                                | 1.53                     | 33.70             |
|                                                                                          | (5) Difference between largest prior platelet count and cohort entry event     | -1.62<br>(-1.68, -1.56)           | -81%                                | 1.42                     | 4.66              |
|                                                                                          | (6) Platelet count mean and standard deviation prior to cohort entry           | -1.20<br>(-1.24, -1.16)           | -86%                                | 0.89                     | 2.22              |
|                                                                                          | (7) All summary measures calculated prior to cohort entry                      | -1.19<br>(-1.24, -1.14)           | -86%                                | 1.22                     | 2.91              |
|                                                                                          | (8) Gold standard                                                              | 0.03<br>(-0.02, 0.08)             | -100%                               | 1.16                     | 1.34              |
| B2: Strongly differential regression-to-the-mean, Disparate platelet count distributions | (1) No Adjustment                                                              | -26.84<br>(-30.22, -23.46)        | REF                                 | 77.18                    | 6673.86           |
|                                                                                          | (2) Platelet count mean prior to cohort entry                                  | -6.21<br>(-6.30, -6.12)           | -77%                                | 2.11                     | 43.03             |
|                                                                                          | (3) Platelet count standard deviation prior to cohort entry                    | -12.48<br>(-12.62, -12.34)        | -54%                                | 3.11                     | 165.47            |
|                                                                                          | (4) Difference between most recent prior platelet count and cohort entry event | -23.47<br>(-23.62, -23.32)        | -13%                                | 3.42                     | 562.64            |
|                                                                                          | (5) Difference between largest prior platelet count and cohort entry event     | -6.72<br>(-6.81, -6.63)           | -75%                                | 2.03                     | 49.32             |
|                                                                                          | (6) Platelet count mean and standard deviation prior to cohort entry           | -5.19<br>(-5.27, -5.11)           | -81%                                | 1.83                     | 30.25             |
|                                                                                          | (7) All summary measures calculated prior to cohort entry                      | -5.04<br>(-5.13, -4.95)           | -81%                                | 2.02                     | 29.43             |
|                                                                                          | (8) Gold standard                                                              | 0.04                              | -100%                               | 1.24                     | 1.53              |

| Scenario <sup>a,b</sup>                                                                                   | Adjustment Metric for Underlying ITP Severity                                  | Bias<br>(95% confidence<br>interval)<br>(-0.01, 0.09) | Percent<br>Change in<br>Absolute Bias<br>(%) | Empirical<br>Standard<br>Error | Mean<br>Square<br>Error |
|-----------------------------------------------------------------------------------------------------------|--------------------------------------------------------------------------------|-------------------------------------------------------|----------------------------------------------|--------------------------------|-------------------------|
| B3: Weakly<br>differential<br>regression-to-<br>the-mean,<br>Similar platelet<br>count<br>distributions   | (1) No Adjustment                                                              | -3.20<br>(-4.49, -1.91)                               | REF                                          | 29.34                          | 870.48                  |
|                                                                                                           | (2) Platelet count mean prior to cohort entry                                  | -0.86<br>(-0.88, -0.84)                               | -73%                                         | 0.55                           | 1.04                    |
|                                                                                                           | (3) Platelet count standard deviation prior to cohort entry                    | -1.98<br>(-2.01, -1.95)                               | -38%                                         | 0.63                           | 4.31                    |
|                                                                                                           | (4) Difference between most recent prior platelet count and cohort entry event | -2.65<br>(-2.68, -2.62)                               | -17%                                         | 0.64                           | 7.46                    |
|                                                                                                           | (5) Difference between largest prior platelet count and cohort entry event     | -1.17<br>(-1.19, -1.15)                               | -63%                                         | 0.44                           | 1.56                    |
|                                                                                                           | (6) Platelet count mean and standard deviation prior to cohort entry           | -0.73<br>(-0.75, -0.71)                               | -77%                                         | 0.51                           | 0.80                    |
|                                                                                                           | (7) All summary measures calculated prior to cohort entry                      | -0.72<br>(-0.74, -0.70)                               | -78%                                         | 0.47                           | 0.74                    |
|                                                                                                           | (8) Gold standard                                                              | -0.01<br>(-0.03, 0.01)                                | -100%                                        | 0.39                           | 0.15                    |
| B4: Strongly<br>differential<br>regression-to-<br>the-mean,<br>Similar platelet<br>count<br>distributions | (1) No Adjustment                                                              | -13.05<br>(-14.36, -11.74)                            | REF                                          | 30.00                          | 1069.88                 |
|                                                                                                           | (2) Platelet count mean prior to cohort entry                                  | -3.05<br>(-3.13, -2.97)                               | -77%                                         | 1.90                           | 12.91                   |
|                                                                                                           | (3) Platelet count standard deviation prior to cohort entry                    | -6.84<br>(-6.93, -6.75)                               | -48%                                         | 2.15                           | 51.35                   |
|                                                                                                           | (4) Difference between most recent prior platelet count and cohort entry event | -8.68<br>(-8.76, -8.60)                               | -33%                                         | 1.87                           | 78.90                   |
|                                                                                                           | (5) Difference between largest prior platelet count and cohort entry event     | -4.39<br>(-4.49, -4.29)                               | -66%                                         | 2.19                           | 24.06                   |
|                                                                                                           | (6) Platelet count mean and standard deviation prior to cohort entry           | -2.76<br>(-2.84, -2.68)                               | -79%                                         | 1.83                           | 10.95                   |
|                                                                                                           | (7) All summary measures calculated prior to cohort entry                      | -2.59<br>(-2.67, -2.51)                               | -80%                                         | 1.93                           | 10.42                   |
|                                                                                                           | (8) Gold standard                                                              | -0.02<br>(-0.06, 0.02)                                | -100%                                        | 0.87                           | 0.76                    |

| Scenario <sup>a,b</sup>                                                             | Adjustment Metric for Underlying ITP Severity                                  | Bias<br>(95% confidence<br>interval) | Percent<br>Change in<br>Absolute Bias<br>(%) | Empirical<br>Standard<br>Error | Mean<br>Square<br>Error |
|-------------------------------------------------------------------------------------|--------------------------------------------------------------------------------|--------------------------------------|----------------------------------------------|--------------------------------|-------------------------|
| B5: Non-differential regression-to-the-mean, Disparate platelet count distributions | (1) No Adjustment                                                              | -2.38<br>(-5.57, 0.81)               | REF                                          | 72.68                          | 5285.40                 |
|                                                                                     | (2) Platelet count mean prior to cohort entry                                  | 0.03<br>(-0.04, 0.10)                | -99%                                         | 1.68                           | 2.81                    |
|                                                                                     | (3) Platelet count standard deviation prior to cohort entry                    | -0.04<br>(-0.09, 0.01)               | -98%                                         | 1.22                           | 1.50                    |
|                                                                                     | (4) Difference between most recent prior platelet count and cohort entry event | 0.03<br>(-0.04, 0.10)                | -99%                                         | 1.70                           | 2.88                    |
|                                                                                     | (5) Difference between largest prior platelet count and cohort entry event     | -0.02<br>(-0.06, 0.02)               | -99%                                         | 0.90                           | 0.81                    |
|                                                                                     | (6) Platelet count mean and standard deviation prior to cohort entry           | 0.01<br>(-0.05, 0.07)                | -100%                                        | 1.32                           | 1.74                    |
|                                                                                     | (7) All summary measures calculated prior to cohort entry                      | -0.02<br>(-0.07, 0.03)               | -99%                                         | 1.21                           | 1.46                    |
|                                                                                     | (8) Gold standard                                                              | 0.00<br>(-0.05, 0.05)                | -100%                                        | 1.17                           | 1.38                    |
| B6: Non-differential regression-to-the-mean, Similar platelet count distributions   | (1) No Adjustment                                                              | -0.93<br>(-2.20, 0.34)               | REF                                          | 28.94                          | 837.99                  |
|                                                                                     | (2) Platelet count mean prior to cohort entry                                  | -0.01<br>(-0.03, 0.01)               | -99%                                         | 0.39                           | 0.15                    |
|                                                                                     | (3) Platelet count standard deviation prior to cohort entry                    | -0.02<br>(-0.04, 0.00)               | -98%                                         | 0.56                           | 0.31                    |
|                                                                                     | (4) Difference between most recent prior platelet count and cohort entry event | 0.00<br>(-0.03, 0.03)                | -100%                                        | 0.62                           | 0.38                    |
|                                                                                     | (5) Difference between largest prior platelet count and cohort entry event     | -0.01<br>(-0.03, 0.01)               | -99%                                         | 0.46                           | 0.21                    |
|                                                                                     | (6) Platelet count mean and standard deviation prior to cohort entry           | -0.01<br>(-0.03, 0.01)               | -99%                                         | 0.41                           | 0.17                    |
|                                                                                     | (7) All summary measures calculated prior to cohort entry                      | -0.01<br>(-0.03, 0.01)               | -99%                                         | 0.37                           | 0.14                    |
|                                                                                     | (8) Gold standard                                                              | -0.02<br>(-0.04, 0.00)               | -98%                                         | 0.36                           | 0.13                    |

<sup>a</sup> The strength of differential RTM refers to the probabilities used to select a patient's treatment based upon their predefined ITP severity strata. Strongly differential RTM corresponds to 0.8/0.2 treatment selection probabilities, weakly differential RTM to 0.6/0.4, and non-differential to 0.5/0.5.

<sup>b</sup> Platelet counts are derived for each patient from normal distributions with a predefined mean ( $\mu$ ) and standard deviation ( $\sigma$ ). Platelet count distributions that differ disparately are defined by  $\mu=100$ ,  $\sigma=50$  for the less-severe versus  $\mu=40$ ,  $\sigma=15$  for the more-severe ITP strata. Platelet count distributions that are relatively similar are defined by  $\mu=55$ ,  $\sigma=20$  for the less-severe versus  $\mu=35$ ,  $\sigma=10$  for the more-severe ITP strata.
